1 **Dysregulated *H19/Igf2* expression disrupts cardiac-placental axis during**  
2 **development of Silver Russell Syndrome-like mouse models**

3  
4 **Suhee Chang<sup>1</sup>, Diana Fulmer<sup>1,2</sup>, Stella K. Hur<sup>1</sup>, Joanne L. Thorvaldsen<sup>1</sup>, Li Li<sup>1,2</sup>, Yemin Lan<sup>1</sup>, Eric**  
5 **A. Rhon-Calderon<sup>1</sup>, N Adrian Leu<sup>3</sup>, Xiaowen Chen<sup>2</sup>, Jonathan A. Epstein<sup>1,2</sup>, Marisa S. Bartolomei<sup>1</sup>**

6  
7 <sup>1</sup>Department of Cell and Developmental Biology, Epigenetics Institute, Perelman School of Medicine,  
8 University of Pennsylvania, Philadelphia, PA, United States

9  
10 <sup>2</sup>Penn Cardiovascular Institute, Perelman School of Medicine, University of Pennsylvania, Philadelphia,  
11 PA, United States

12  
13 <sup>3</sup>Department of Biomedical Sciences, School of Veterinary Medicine, Institute for Regenerative  
14 Medicine, University of Pennsylvania, Philadelphia, PA, United States

15  
16 [*Keywords: H19; Igf2; SRS; cardiac development; cardiac-placental axis; VSD; ECM; endothelial cells*]

17 **Corresponding author: bartolom@pennmedicine.upenn.edu**

## 18 **Abstract**

19           Dysregulation of the imprinted *H19/IGF2* locus can lead to Silver-Russell Syndrome (SRS) in  
20 humans. However, the mechanism of how abnormal *H19/IGF2* expression contributes to various SRS  
21 phenotypes remains unclear, largely due to incomplete understanding of the developmental functions of  
22 these two genes. We previously generated a mouse model with humanized *H19/IGF2* ICR (*hIC1*) on the  
23 paternal allele that exhibited *H19/Igf2* dysregulation together with SRS-like growth restriction and  
24 perinatal lethality. Here we dissect the role of *H19* and *Igf2* in cardiac and placental development utilizing  
25 multiple mouse models with varying levels of *H19* and *Igf2*. We report severe cardiac defects such as  
26 ventricular septal defects (VSDs) and thinned myocardium, placental anomalies including thrombosis and  
27 vascular malformations, together with growth restriction in mouse embryos that correlated with the extent  
28 of *H19/Igf2* dysregulation. Transcriptomic analysis using cardiac endothelial cells of these mouse models  
29 shows that *H19/Igf2* dysregulation disrupts pathways related to extracellular matrix (ECM) and  
30 proliferation of endothelial cells. Our work links the heart and placenta through regulation by *H19* and  
31 *Igf2*, demonstrating that accurate dosage of both *H19* and *Igf2* is critical for normal embryonic  
32 development, especially related to the cardiac-placental axis.

33

## 34 **Introduction**

35           Genomic imprinting is a mammalian-specific phenomenon where a small number of genes are  
36 expressed in an allele-specific manner. Functionally, imprinted genes have central roles in development  
37 and growth in both humans and mice (Barlow & Bartolomei, 2014). Additionally, proper gene dosage of  
38 most imprinted genes is essential for normal development. Human chromosome 11 and the orthologous  
39 region on mouse chromosome 7 harbor two jointly controlled growth regulators with opposing functions;  
40 *H19* long noncoding RNA (lncRNA) and Insulin-like Growth Factor 2 (*IGF2/Igf2*). These two imprinted  
41 genes share an imprinting control region (ICR), a *cis*-regulatory element located between two genes,  
42 which is essential for their allele-specific expression, as well as tissue-specific enhancers located

43 downstream of *H19* (Chang & Bartolomei, 2020). The *H19/IGF2* ICR, which is designated as IC1 in  
44 humans, binds CTCF on the maternal allele, forming an insulator and enabling *H19* exclusive access to  
45 the shared enhancers (Figure 1A). On the paternal allele, the *H19/IGF2* ICR is methylated, which  
46 prevents CTCF from binding and an insulator from forming. Consequently, *IGF2* usurps the shared  
47 enhancers and *H19* is repressed on the paternal allele. Ultimately, allele-specific ICR methylation  
48 facilitates monoallelic expression of *H19* and *IGF2* with *H19* expressed from the maternal allele and  
49 *IGF2* expressed from the paternal allele.

50         Dysregulation of the *H19/IGF2* cluster is associated with two growth disorders, Beckwith-  
51 Wiedemann Syndrome (BWS) and Silver-Russell Syndrome (SRS). In contrast to overgrowth observed  
52 for BWS, SRS is characterized by intrauterine growth restriction resulting in small for gestational age  
53 (SGA) births. Other symptoms of SRS vary widely among patients and include hemihypotrophy,  
54 cognitive impairment, relative macrocephaly, and fifth-finger clinodactyly (Wakeling et al., 2017).  
55 Approximately 50% of patients with SRS exhibit IC1 hypomethylation (Eggermann et al., 2011). Lack of  
56 methylation may allow the formation of an ectopic insulator on paternal IC1, which likely explains why  
57 this class of SRS individuals has biallelic *H19* expression and greatly diminished *IGF2* expression (Abi  
58 Habib et al., 2017; Gicquel et al., 2005). Importantly, ICR mutations in the mouse that were generated to  
59 study imprinted gene regulation provided critical information suggesting a role for *H19* and *IGF2* in SRS.  
60 For example, mutating CpGs at CTCF sites on the paternal *H19/Igf2* ICR resulted in the loss of ICR  
61 methylation, activation of paternal *H19* and reduced *Igf2* expression (Engel et al., 2004). This mutation  
62 led to restricted embryonic growth, which phenocopies SRS. Nevertheless, although we and others  
63 successfully modeled a subset of SRS mutations in the mouse, not all mutations were translatable because  
64 the mouse *H19/Igf2* ICR lacks extensive sequence conservation with human IC1. Thus, a mouse model  
65 with human IC1 sequence substituted for the endogenous mouse *H19/Igf2* ICR was generated (*H19<sup>hIC1</sup>*,  
66 shortened as *hIC1*; Hur et al., 2016) to model human mutations more precisely (Freschi et al., 2018,  
67 2021). Consistent with expectations, maternally transmitted *hIC1* successfully maintained insulator  
68 function, suggesting the possibility to model human IC1 mutations endogenously in mice upon maternal

69 transmission. In contrast, paternally transmitted *hICI* showed loss of methylation and formation of an  
70 ectopic insulator. Consequently, paternal *hICI* transmission caused elevated *H19* expression and *Igf2*  
71 depletion together with growth restriction and embryonic lethality (Hur et al., 2016). Although the  
72 epigenetic defects and growth restriction of these mice nicely model SRS symptoms, many SRS  
73 individuals are viable. A potential explanation for such discrepancy between human and mouse could  
74 reflect the mosaic nature of epigenetic defects in human (Soellner et al., 2019), with a subset of cells  
75 showing normal methylation patterns.

76 The mechanism by which *H19/IGF2* expression dysregulation causes SRS phenotypes is  
77 unknown, largely because the function of these two genes during development is incompletely  
78 understood. *IGF2* is a well-described growth factor promoting fetoplacental growth, which functions in  
79 an endocrine/paracrine manner through binding to IGF/Insulin receptors (Harris & Westwood, 2012).  
80 Decreased *IGF2* levels in patients with SRS suggests that IGF2 contributes to restricted growth in these  
81 patients (Abi Habib et al., 2017; Begemann et al., 2015; Gicquel et al., 2005). Consistently, in mice,  
82 paternal-specific deletion of *Igf2* resulted in loss of *Igf2* expression and pre- and postnatal growth  
83 restriction (DeChiara et al., 1991; Haley et al., 2012). In contrast, the exact role of *H19* remains unclear.  
84 Previous studies in mouse suggested that *H19* lncRNA is a precursor for microRNA (miR)-675, which  
85 regulates *Igf1r* expression (Keniry et al., 2012), and that *H19* represses *Igf2* expression *in trans* (Gabory  
86 et al., 2009). As a result, *H19* has been largely overlooked and suggested to be an occasional regulator of  
87 *Igf2* expression. Nevertheless, a previously described mouse model with *H19* overexpression without  
88 changes in *Igf2* expression showed embryonic growth restriction (Drewell et al., 2000), suggesting that  
89 *H19* mediates growth suppression independently from *Igf2*. Here, we report severe developmental defects  
90 of the heart and placenta in mouse models with dysregulated *H19/Igf2* expression. Embryos with the  
91 paternal *hICI* showed atrioventricular (AV) cushion defects in the heart coupled with ventricular septal  
92 defects (VSDs), and extremely thinned myocardial walls. Combined with placental anomalies, the cardiac  
93 defects most likely contribute to the lethality of these mice (Kochilas et al., 1999; Snider & Conway,  
94 2011). Deletion of *H19* from the maternal allele, thereby reducing *H19* levels, failed to rescue completely

95 the lethality and growth restriction associated with the paternal inheritance of *hIC1*. A minimal rescue of  
 96 the earlier growth and resorption frequency was, however, observed with normalized *H19* expression.  
 97 Ultimately, modifying both *H19* and *Igf2* expression was necessary to rescue most phenotypes.  
 98 Transcriptomic analysis of embryonic cardiac endothelial cells identified several key signaling pathways  
 99 that are affected by the dysregulated *H19* and *Igf2*, and are potentially responsible for the paternal *hIC1*-  
 100 related cardiac defects. This work emphasizes the importance of accurate dosage of *H19* and *Igf2*  
 101 expression in normal cardiac and placental development, disruption of which can lead to SRS-like  
 102 pathologies.

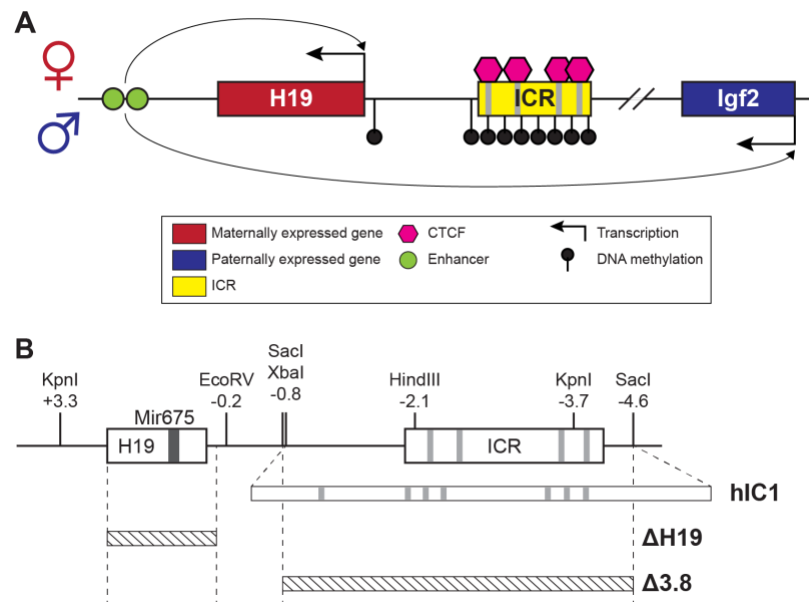

103  
 104

**Figure 1. *H19/Igf2* cluster and mouse models utilized in this study.**

(A) A schematic representation of the wild-type *H19/Igf2* cluster in mouse. The maternally-expressed *H19* and the paternally-expressed *Igf2* genes are shown in red and blue, respectively. Black lollipops on the paternal allele represent DNA methylation. The maternal ICR is bound to CTCF proteins (pink hexagons) at CTCF binding sites, forming an insulator that blocks the maternal *Igf2* promoter from the shared enhancers (green circles). These enhancers interact with the *H19* promoter on the maternal allele and *Igf2* promoter on the paternal allele. (B) Schematic of the mouse endogenous *H19/Igf2* ICR, *H19<sup>hIC1</sup>* (shortened as *hIC1*; Hur et al. 2016), *H19<sup>Δ2.8kb-H19</sup>* (shortened as  $\Delta H19$ ), and *H19<sup>Δ3.8kb-5'H19</sup>* (shortened as  $\Delta 3.8$ ; Thorvaldsen et al. 2002, 2006) alleles. Restriction site locations (kb) are relative to the *H19* transcription start site. Gray lines on the ICR represent conserved CTCF binding sequences.

## 105 **Results**

106           Mouse models with genetic modifications that perturb *H19* and *Igf2* to different extents were used  
107 to address the phenotypic consequences of abnormal *H19* and *Igf2* levels (Figure 1B). *hIC1* refers to the  
108 humanized *H19<sup>hIC1</sup>* allele that substitutes the endogenous mouse *H19/Igf2* ICR with the corresponding  
109 human IC1 sequence, which was initially generated to study human BWS and SRS mutations in the  
110 mouse (Freschi et al., 2018; Hur et al., 2016). Paternal transmission of *hIC1* [+/*hIC1*] was previously  
111 reported to increase *H19* and greatly diminish *Igf2* expression and resulted in embryonic lethality.

112

### 113 **Cardiac and placental defects in +/*hIC1* embryos**

114           Our initial experiments examined the developmental phenotype of +/*hIC1* embryos to determine  
115 how abnormal *H19/Igf2* expression resulted in dramatic growth defects and lethality. As previously  
116 reported (Hur et al., 2016), +/*hIC1* embryos showed severe growth restriction (note that for heterozygous  
117 embryos, maternal allele is written first, Figure 2A). The growth restriction appeared as early as E11.5  
118 and was greatly exaggerated by the end of gestation. Although E18.5 +/*hIC1* embryos were observed  
119 alive and weighed approximately 40% of their wild-type littermates, +/*hIC1* neonates were perinatally  
120 lethal, with no live pups found on the day of birth. To ascertain the source of lethality, we first examined  
121 lungs from dead +/*hIC1* neonates. The lungs floated in water, demonstrating that +/*hIC1* pups respired  
122 after birth (Borensztein et al., 2012). Additionally, +/*hIC1* neonates did not have a cleft palate, but no  
123 milk spots were found in their abdomen, indicating a lack of feeding.

124           Histological analyses were performed throughout development on major organs where *H19* and  
125 *Igf2* are highly expressed. Severe developmental defects were found in the +/*hIC1* heart and placenta.  
126 Cardiac defects in +/*hIC1* embryos were observed as early as E12.5, where the superior and inferior  
127 endocardial cushions failed to fuse into a common AV cushion (Figure 2C). The cushion defect preceded  
128 incomplete interventricular septum (IVS) formation. At E15.5, a severe perimembranous ventricular  
129 septal defect (VSD) was observed in all 5 +/*hIC1* hearts that were evaluated (Figure 2C). Importantly,  
130 this congenital heart defect resembles malformations reported in several SRS patients with IC1

131 hypomethylation (Ghanim et al., 2013), although the prevalence is unclear and may reflect the degree of  
132 mosaicism in SRS. Additionally, E15.5 hearts showed an extremely thin myocardium (Figure 2C and  
133 Supplemental Figure 1A). Both VSD and thinned ventricular walls persisted in E17.5 *+hICI* hearts  
134 (Figure 2B and C). Additionally, 6 out of 16 *+hICI* hearts in the late gestation group (E15.5 to P0) had  
135 bicuspid pulmonary valve (BPV), a rare cardiac defect in which the pulmonary valve only develops two  
136 cusps as opposed to the normal tricuspid structure (Figure 2D and Supplemental Figure 2). These results  
137 demonstrate that paternal *hICI* transmission results in variably penetrant cardiac phenotypes. Notably,  
138 atrioventricular valvuloseptal morphogenesis, the fusion of the AV cushion and nascent septa during  
139 cardiogenesis, is required for proper cardiac septation (Eisenberg & Markwald, 1995). Segmentation of  
140 the heart into four separate chambers is required to establish distinct pulmonary and systemic blood flow  
141 during heart development and is required to prevent the mixing of oxygenated and deoxygenated blood.  
142 We speculate that the failure of *hICI* mutants to establish complete ventricular septation could have led to  
143 a reduced ability to provide oxygen and nutrient rich blood to the rest of the developing body (Savolainen  
144 et al., 2009; Spicer et al., 2014).

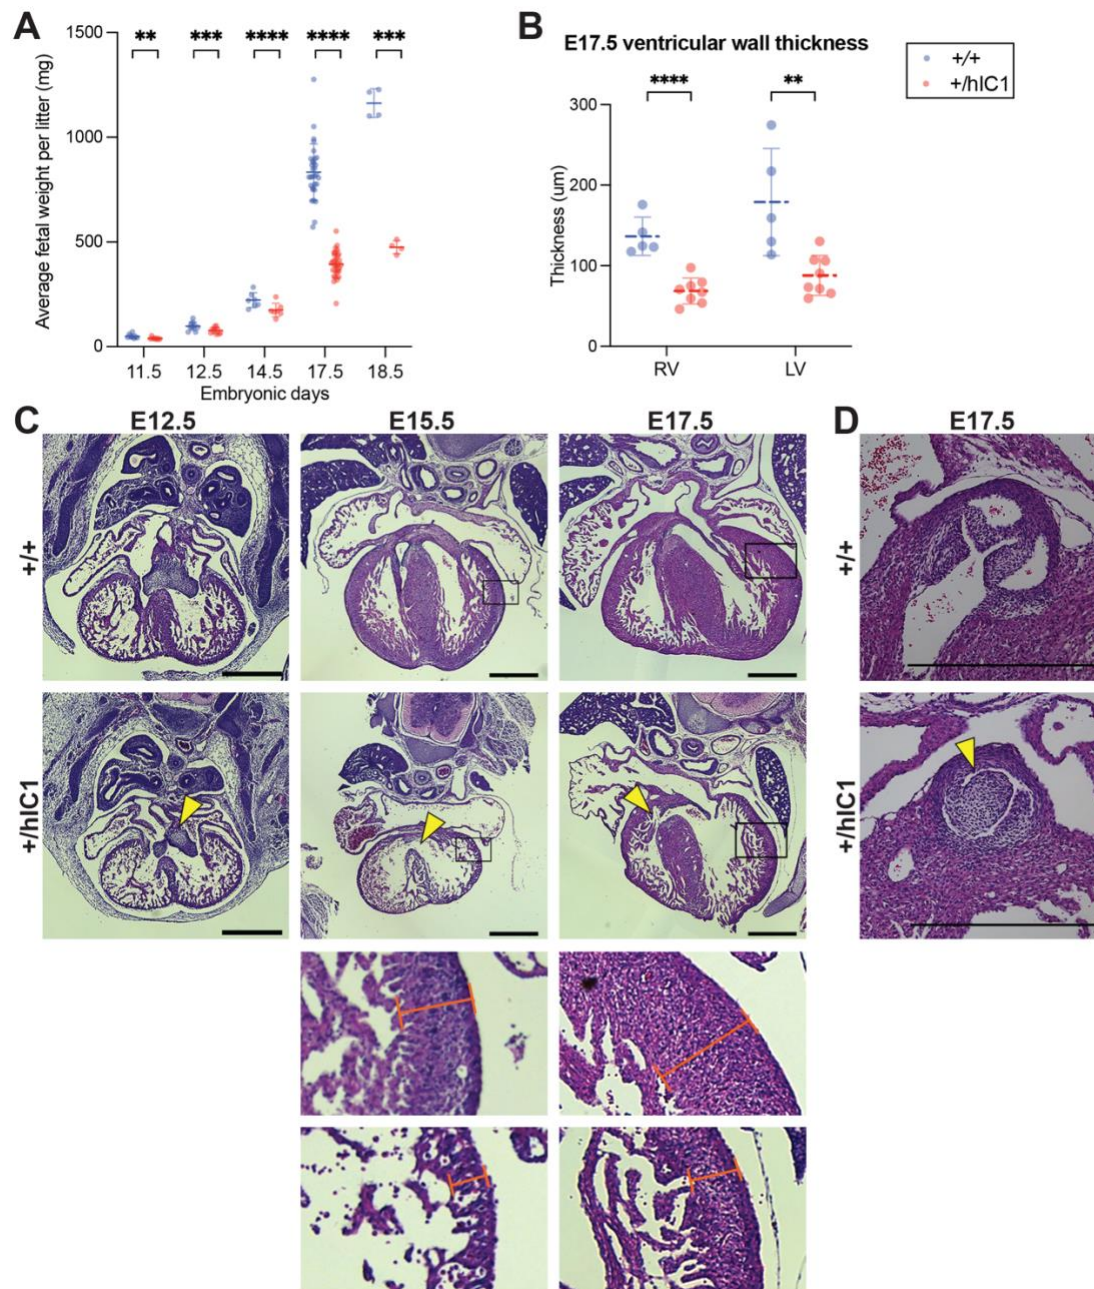

**Figure 2. Growth anomalies and cardiac defects of +/h1C1 embryos.**

(A) Fetal weight of the wild-type (blue) and +/h1C1 (red) embryos at E11.5, E12.5, E14.5, E17.5 and E18.5 (mean  $\pm$  SD). Each data point represents an average weight of each genotype from one litter. 8 litters for E11.5, 10 litters for E12.5, 7 litters for E14.5, 31 litters for E17.5, 4 litters for E18.5 are presented. (B) Quantification of ventricular wall thickness ( $\mu$ m), measured from E17.5 wild-type and +/h1C1 hearts (mean  $\pm$  SD). Each data point represents an individual conceptus. 5 wild-type and 8 +/h1C1 embryos from four different litters were examined. (C) Representative cross-sections of wild-type and +/h1C1 embryonic hearts at E12.5, E15.5 and E17.5, stained with hematoxylin and eosin. All the hearts represented here are from female fetuses. Note the lack of fusion between AV cushions at



E12.5, the VSD at E15.5 and E17.5 in *+hIC1* hearts (yellow arrowheads). The boxed regions of E15.5 and E17.5 images are enlarged at the bottom of the figure, to show where the ventricular wall thickness is measured. Scale bars = 500  $\mu$ m. (D) A representative image of pulmonary valves in E17.5 wild-type and *+hIC1* hearts. The *+hIC1* right pulmonary cusp is enlarged (yellow arrowhead) and there is no cusp in the anterior position, in contrast to the tricuspid structure in the wild-type heart. Scale bars = 500  $\mu$ m. Statistics used are (A) multiple paired t-test and (B) multiple unpaired t-test with \*\* $P < 0.01$ , \*\*\* $P < 0.001$ , \*\*\*\* $P < 0.0001$  and ns = not significant.

146

147 Another major organ with high *H19/Igf2* expression, which forms early in development, is the  
148 placenta. Multiple developmental defects were observed in *+hIC1* placentas. As previously described  
149 (Hur et al., 2016), *+hIC1* placentas were growth restricted throughout development (Figure 3A),  
150 although the fetal to placental weight ratio was not affected through E15.5 (Supplemental Figure 1B).  
151 However, at E17.5, the fetal to placental weight ratio was lower in *+hIC1* conceptuses, indicating that  
152 the fetal growth restriction was more severe than the placental growth restriction as the concepti neared  
153 term (Figure 3B). In addition to placental undergrowth, the junctional to labyrinth zone ratio was  
154 increased in *+hIC1* placentas (Figure 3C and Supplemental Figure 1C), suggesting that the growth of the  
155 labyrinth layer, where the maternal-fetal exchange occurs, was more affected. Moreover, *H19*  
156 overexpression was exaggerated in the labyrinth in E17.5 *+hIC1* placentas, while the *Igf2* depletion was  
157 consistent throughout the whole placenta (Figure 3D), possibly indicating that *H19* overexpression  
158 contributed disproportionately to the phenotype of growth restriction in the labyrinth. Large thrombi were  
159 observed in the labyrinth zone of these *+hIC1* placentas (Figure 3F), in a male-skewed manner (Figure  
160 3E). As the thrombi could be formed due to defective vasculature structures, wild-type and *+hIC1*  
161 placentas were stained for CD34, a marker for the fetoplacental endothelial cells that line the microvessels  
162 in the labyrinth layer. Vessels in the *+hIC1* labyrinth were highly dilated (Figure 3G), and quantification  
163 of the stained areas showed that the microvascular density was significantly decreased in *+hIC1*  
164 placentas among males (Figure 3H and Supplemental Figure 1D). Although previous studies reported that  
165 *Igf2*-null mice had lower placental glycogen concentration (Lopez et al., 1996) and *H19* deletion led to  
166 increased placental glycogen storage (Esquiliano et al., 2009), Periodic acid-Schiff (PAS) staining on

167 *+hIC1* placentas showed that the glycogen content is not significantly different between wild-type and  
168 *+hIC1* placentas (Supplemental Figure 1E). The reduced labyrinth layer and defective microvascular  
169 expansion likely compromised the ability of *+hIC1* placentas to supply nutrients and oxygen to the fetus.  
170 These results support the hypothesis that the abnormal growth of *+hIC1* embryos may be explained by  
171 failure in multiple organs, especially the heart and placenta, which are developmentally linked (Barak et  
172 al., 2019).

173 Additionally, we examined expression of the *H19*-derived miR-675 in *+hIC1* placentas to  
174 determine if the level of miR-675 is correlated with changes in *H19* and *Igf2* expression. This analysis  
175 was conducted at E15.5 when cardiac and placental defects were already observed in *+hIC1* embryos  
176 (Supplemental Figure 1A, 1C and Supplemental Figure 2). Despite increased *H19* expression and *Igf2*  
177 depletion (Hur et al., 2016), miR-675 was not significantly increased in *+hIC1* placentas compared to the  
178 wild-type (Supplemental Figure 1F). Thus, we conclude that the placental phenotypes observed in *+hIC1*  
179 mice are solely attributable to the increased *H19* lncRNA, irrespective of miR-675. Another possibility is  
180 that the disproportionate *H19* overexpression in the labyrinth layer at E17.5 (Figure 3D) was also present  
181 at E15.5 because growth suppression was more severe in labyrinth than in junctional zone in E15.5  
182 (Supplemental Figure 1C) and in E17.5 placenta (Figure 3C). This would have made it difficult to detect a  
183 substantial difference in miR-675 expression in the whole placenta.

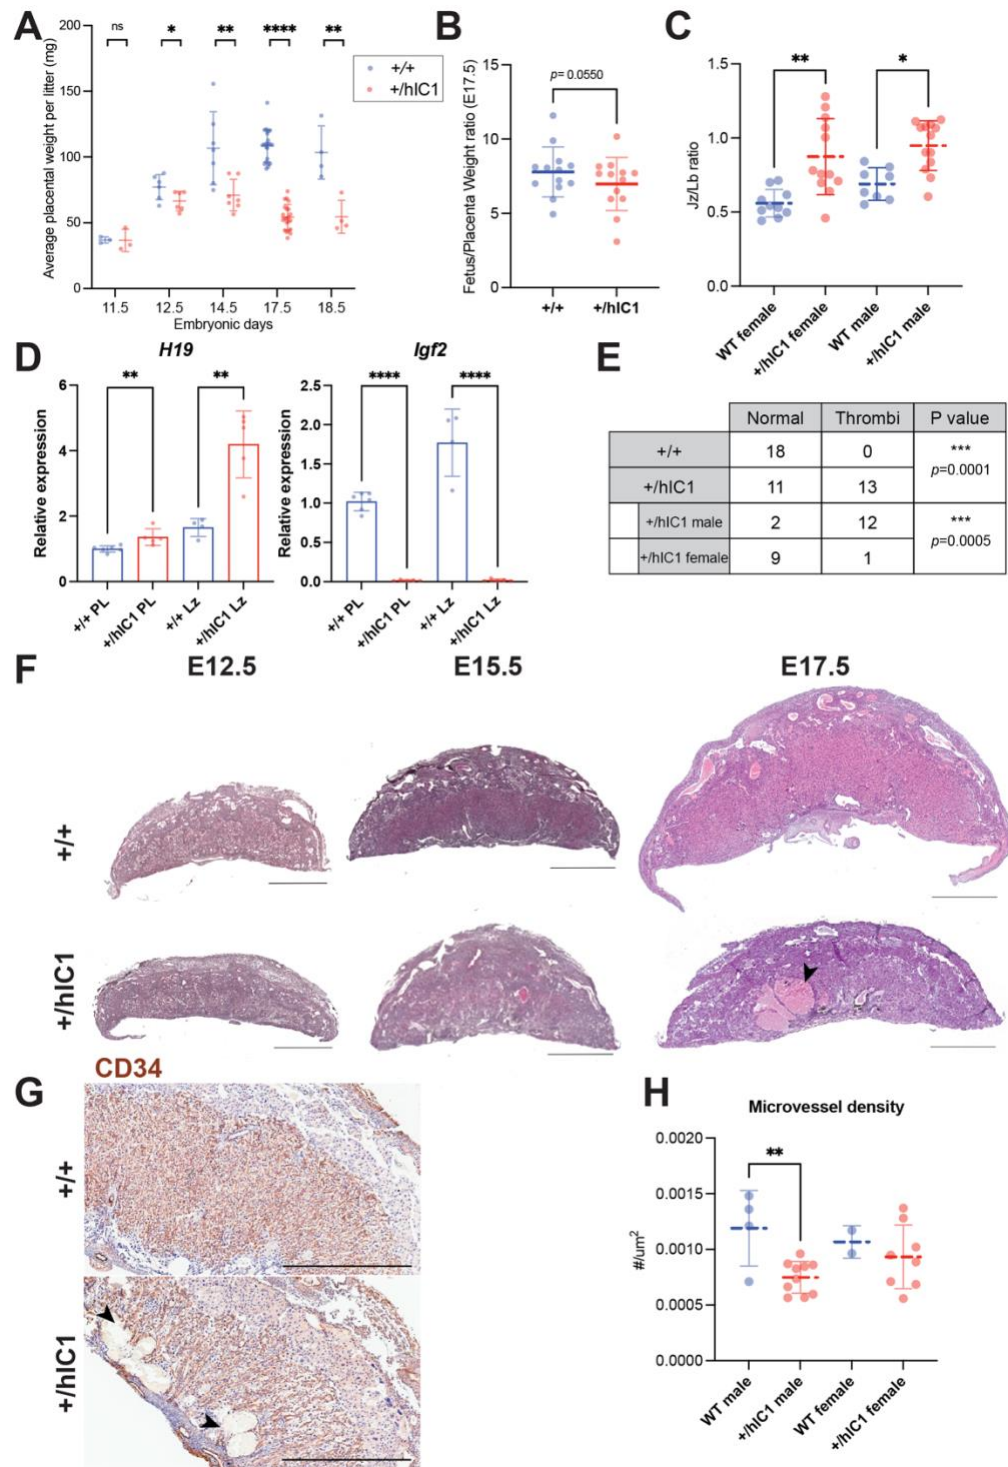

**Figure 3. Placental defects of +/hIC1 embryos.**

(A) Placental weight of the wild-type (blue) and +/hIC1 (red) samples at E11.5, E12.5, E14.5, E17.5 and E18.5 (mean ± SD). Each data point represents an average weight of each genotype from one litter. 3 litters for E11.5, 6 litters for E12.5, 7 litters for E14.5, 22 litters for E17.5, 4 litters for E18.5 are presented. (B) Fetal to placental weight ratios in E17.5 wild-type and +/hIC1 samples (mean ± SD).

Each data point represents the average F/P ratio of each genotype from one litter. 13 litters are presented. (C) Junctional zone (Jz) to labyrinth (Lb) ratio in E17.5 wild-type and *+hIC1* placentas (mean  $\pm$  SD). (D) Relative total expression of *H19* and *Igf2* in E17.5 wild-type and *+hIC1* placentas and labyrinth samples (mean  $\pm$  SD). (E) Number of wild-type, male and female *+hIC1* placentas with thrombi observed. (F) Representative cross-sections of E12.5, E15.5 and E17.5 wild-type and *+hIC1* placentas stained with hematoxylin and eosin. All depicted E12.5, E15.5 placentas are female. The E17.5 wild-type placenta is female and *+hIC1* placenta is male. Black arrowhead indicates a large thrombus formed in the *+hIC1* labyrinth. Scale bars = 1mm. (G) Representative images of CD34 immunostaining counterstained with hematoxylin on E17.5 wild-type female and *+hIC1* male placental sections. Black arrowheads indicate thrombi in the *+hIC1* labyrinth. Scale bars = 1mm. (H) Quantification of the microvessel density in E17.5 wild-type and *+hIC1* placentas. 4 wild-type male, 10 *+hIC1* male, 2 wild-type female, 8 *+hIC1* female placentas from 6 litters were quantified. (C, D, H) Each data point represents an individual conceptus from different litters. Statistics used are (A, B) multiple paired t-test, (C) one-way ANOVA with Tukey's multiple comparisons test, (D, H) multiple unpaired t-test, (E) Fisher's exact test. \* $P < 0.05$ , \*\* $P < 0.01$ , \*\*\* $P < 0.001$ , \*\*\*\* $P < 0.0001$ , ns = not

185

## 186 **Normalizing *H19* expression partially rescues paternal *hIC1* defects**

187 It has been previously reported that *Igf2* null mice are viable (DeChiara et al., 1991). Thus, we  
188 hypothesize that *H19* overexpression combined with a loss of *Igf2* expression is the molecular contributor  
189 to the lethality of paternal *hIC1* transmission. To examine if reduced *H19* expression would rescue the  
190 paternal *hIC1* transmission phenotypes, we generated a mouse model with deletion of the *H19*  
191 transcription unit [*H19* <sup>$\Delta$ 2.8kb-*H19*</sup>; shortened as  $\Delta$ *H19*] (Figure 1B, Supplemental Figure 3A and B).  
192 Consistent with previous reports, maternal deletion of *H19* [ $\Delta$ *H19*/+] led to an absence of *H19*  
193 expression and tissue-specific minimal activation of maternal *Igf2* (Supplemental Figure 3C). These mice  
194 are viable and fertile, regardless of whether the deletion is maternally or paternally transmitted, although  
195 maternal transmission is associated with increased fetal weight from E14.5 and onwards (Supplemental  
196 Figure 3D).

197 Heterozygous  $\Delta$ *H19* females were mated with heterozygous *hIC1* males to generate  $\Delta$ *H19*/*hIC1*  
198 embryos. These embryos were expected to have lower *H19* expression compared to *+hIC1* embryos, as  
199 the maternal *H19* expression was silenced (Figure 4A). Among four possible genotypes from this

200 breeding,  $+/hIC1$  embryos constituted approximately 15% per litter at E17.5, as opposed to the expected  
201 Mendelian ratio of 25%. In contrast,  $\Delta H19/hIC1$  embryos comprised approximately 30% per litter at  
202 E17.5, indicating partial rescue of the resorption frequency by maternal  $H19$  deletion (Figure 4B and  
203 Supplemental Figure 4A). However,  $\Delta H19/hIC1$  embryos still exhibited perinatal lethality, with no live  
204 pups observed on the day of birth. With respect to growth restriction, the maternal  $\Delta H19$  allele partially  
205 rescued the phenotype. At E11.5,  $\Delta H19/hIC1$  fetal weight was not significantly different from wild-type  
206 littermates (Figure 4C). However, at late gestation (E17.5), although  $\Delta H19/hIC1$  fetuses had a significant  
207 increase in fetal weight compared to the  $+/hIC1$  fetuses,  $\Delta H19/hIC1$  fetuses remained significantly  
208 smaller compared to wild-type. As perinatal lethality was still observed, conceptuses were analyzed  
209 histologically to characterize their developmental defects. The AV cushion defect persisted in all  
210 examined E13.5  $\Delta H19/hIC1$  embryos, and 50% of the examined E17.5  $\Delta H19/hIC1$  hearts showed either  
211 perimembranous or muscular VSDs (Figure 4D). Thrombi were still present in approximately 50% of  
212  $\Delta H19/hIC1$  placentas (Figure 4E and Supplemental Figure 4D), and placental weight remained  
213 significantly lower compared to wild-type littermates (Supplemental Figure 4B). Of note, none of these  
214 histological defects were observed in  $\Delta H19/+$  embryonic hearts and placentas (see Figure 4D for  
215 example; 3  $\Delta H19/+$  hearts each from E13.5, E15.5 and E17.5 concepti, and 20 E17.5  $\Delta H19/+$  placentas  
216 were examined). E17.5  $\Delta H19/hIC1$  tissues demonstrated wild-type levels of  $H19$  expression, while the  
217  $Igf2$  expression remained markedly lower than wild-type (Figure 4F and Supplemental Figure 4C). From  
218 these results, we conclude that restoring  $H19$  expression is not sufficient to rescue completely the lethality  
219 and developmental defects upon paternal transmission of  $hIC1$ . Thus, phenotypes are likely caused by  
220 abnormal expression of both  $H19$  and  $Igf2$ .

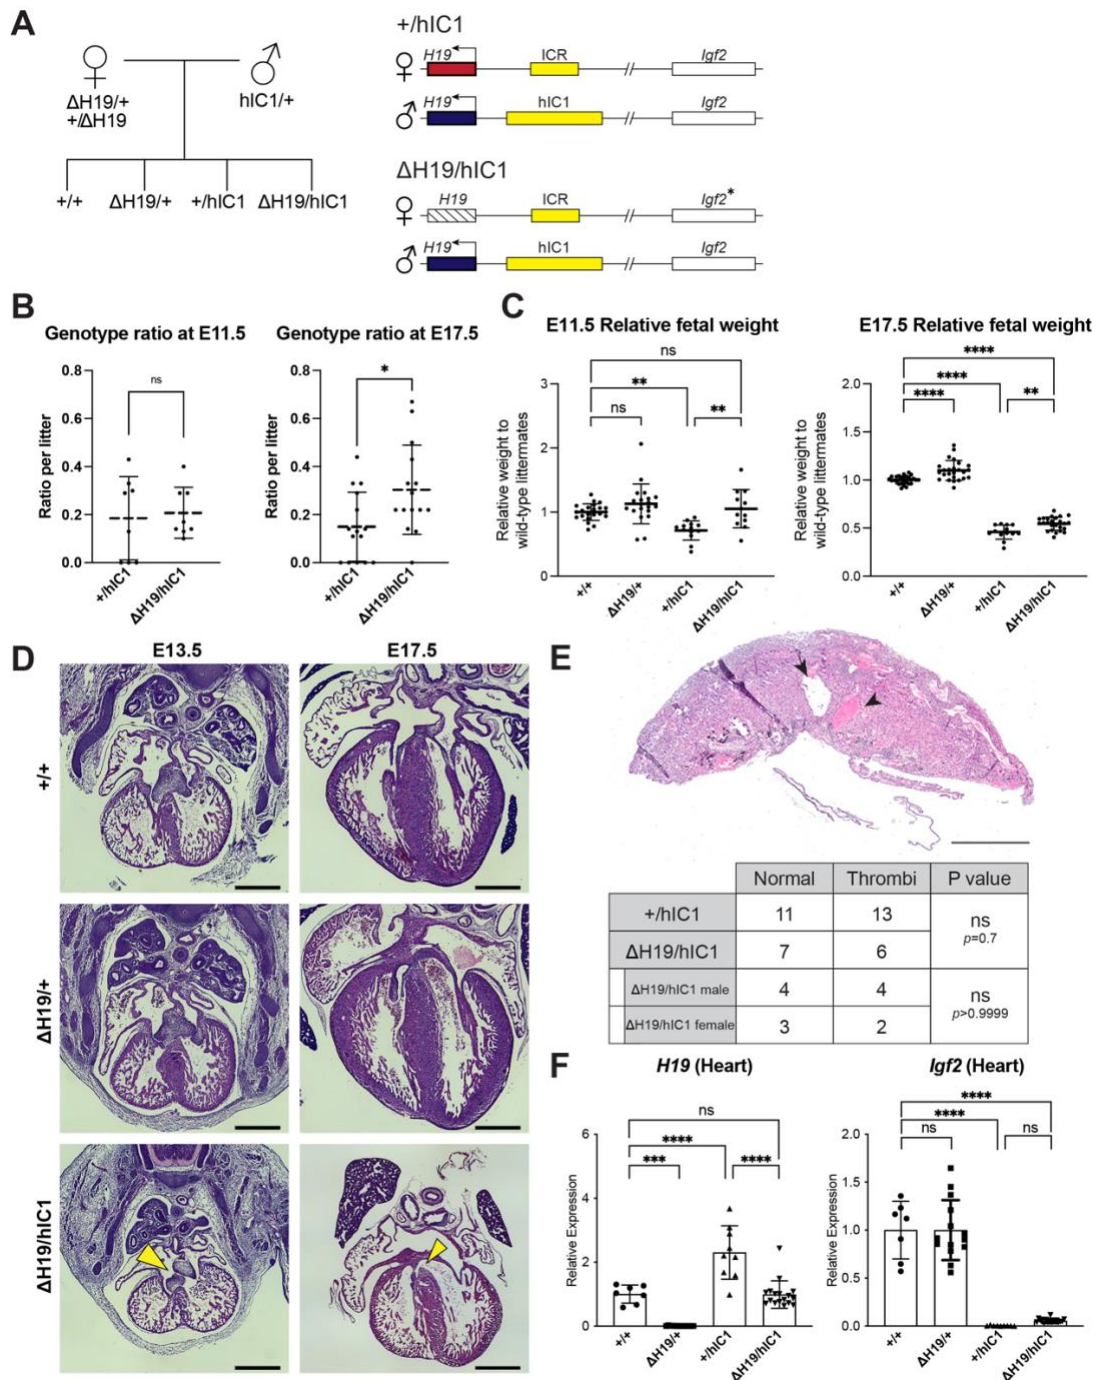

**Figure 4. Normalizing *H19* expression through the maternal deletion of *H19*.**

(A) A schematic representation of the rescue breeding between  $\Delta H19$  heterozygous female and *hIC1*/+ male mice.  $\Delta H19/hIC1$  embryos are expected to express *H19* only from the paternal allele, and maternally express *Igf2* in a tissue-specific manner. (B) Ratio of +/*hIC1* and  $\Delta H19/hIC1$  embryos observed in E11.5 and E17.5 litters (mean  $\pm$  SD). 8 E11.5 litters and 15 E17.5 litters with litter size larger than 5 pups were examined. Each data point represents one litter. (C) Relative fetal weights of wild-type,  $\Delta H19/+$ , +/*hIC1* and  $\Delta H19/hIC1$  embryos at E11.5 and E17.5, normalized to the average

body weight of the wild-type littermates (mean  $\pm$  SD). (D) Representative cross-sections of wild-type,  $\Delta H19/+$  and  $\Delta H19/hIC1$  embryonic hearts at E13.5 and E17.5, stained with hematoxylin and eosin. Note the cushion defect at E13.5 and the VSD at E17.5 in  $\Delta H19/hIC1$  hearts (yellow arrows). All E13.5 samples and E17.5 wild-type sample are male, E17.5  $\Delta H19/+$  and  $\Delta H19/hIC1$  samples are female. Scale bars = 500  $\mu$ m. (E) (Top) Representative cross-section of E17.5  $\Delta H19/hIC1$  male placenta stained with hematoxylin and eosin. Black arrowheads indicate thrombi. Scale bar = 1mm. (Bottom) Number of the wild-type, male and female  $+/hIC1$  placentas with thrombi observed. (F) Relative total expression of *H19* and *Igf2* in E17.5 wild-type,  $\Delta H19/+$ ,  $+/hIC1$  and  $\Delta H19/hIC1$  hearts (mean  $\pm$  SD). (C, F) Each data point represents an individual conceptus from different litters. Statistics used are (B, C, F) one-way ANOVA with Tukey's multiple comparisons test and (E) Fisher's exact test. \* $P < 0.05$ , \*\* $P < 0.01$ , \*\*\* $P < 0.001$ , \*\*\*\* $P < 0.0001$ , ns = not significant.

222

### 223 **Paternal *hIC1* defects are rescued by deletion of the maternal *H19/Igf2* ICR**

224 Finally, we utilized a previously published mouse model with a 3.8-kb deletion spanning the  
225 *H19/Igf2* ICR [*H19* <sup>$\Delta 3.8kb-5'H19$</sup> ; shortened as  $\Delta 3.8$ ] to modulate both *H19* and *Igf2* expression (Thorvaldsen  
226 et al., 2002, 2006). Absence of the maternal *H19/Igf2* ICR activates the maternal *Igf2* allele and reduces  
227 *H19* expression. Thus, *Igf2* expression from the maternal allele in  $\Delta 3.8/hIC1$  embryos was expected to  
228 restore *Igf2* levels (Figure 5A).

229 Crosses between heterozygous  $\Delta 3.8$  females and heterozygous *hIC1* males produced the  
230 expected Mendelian ratio of offspring with  $\Delta 3.8/hIC1$  mice appearing fully viable. Both fetal and  
231 placental weights were not significantly different between  $\Delta 3.8/hIC1$  and wild-type concepti at E17.5  
232 (Figure 5B and Supplemental Figure 5A), demonstrating full rescue of the lethality and growth  
233 restriction. However, a subset of  $\Delta 3.8/+$  and  $\Delta 3.8/hIC1$  embryonic hearts (3 out of 6  $\Delta 3.8/+$  hearts and  
234 2 out of 5  $\Delta 3.8/hIC1$  hearts) had VSDs, although the lesions in the IVS were smaller than those found in  
235  $+/hIC1$  hearts (Figure 5C). While *Igf2* expression in the E17.5  $\Delta 3.8/hIC1$  hearts was restored to wild-  
236 type levels, normalization of *H19* expression varied among embryos. Although not statistically significant  
237 in heart,  $\Delta 3.8/hIC1$  embryos tended to have higher *H19* expression compared to the wild-type littermates  
238 (Figure 5D and Supplemental Figure 5B). These results suggest that the physiological levels of *H19* and

239 *Igf2* expression are critical for normal cardiac development, and the variability in *H19* rescue could help  
240 to explain the varying penetrance of the cardiac phenotype. No thrombi were detected in the  $\Delta 3.8/hIC1$   
241 placentas, and the placental morphology was normal with the junctional to labyrinth zone ratio not  
242 significantly different compared to wild-type (Supplemental Figure 5C). In sum, restoring both *H19* and  
243 *Igf2* to near wild-type levels was necessary for the full rescue of the most severe pathologies of paternal  
244 *hIC1* transmission.



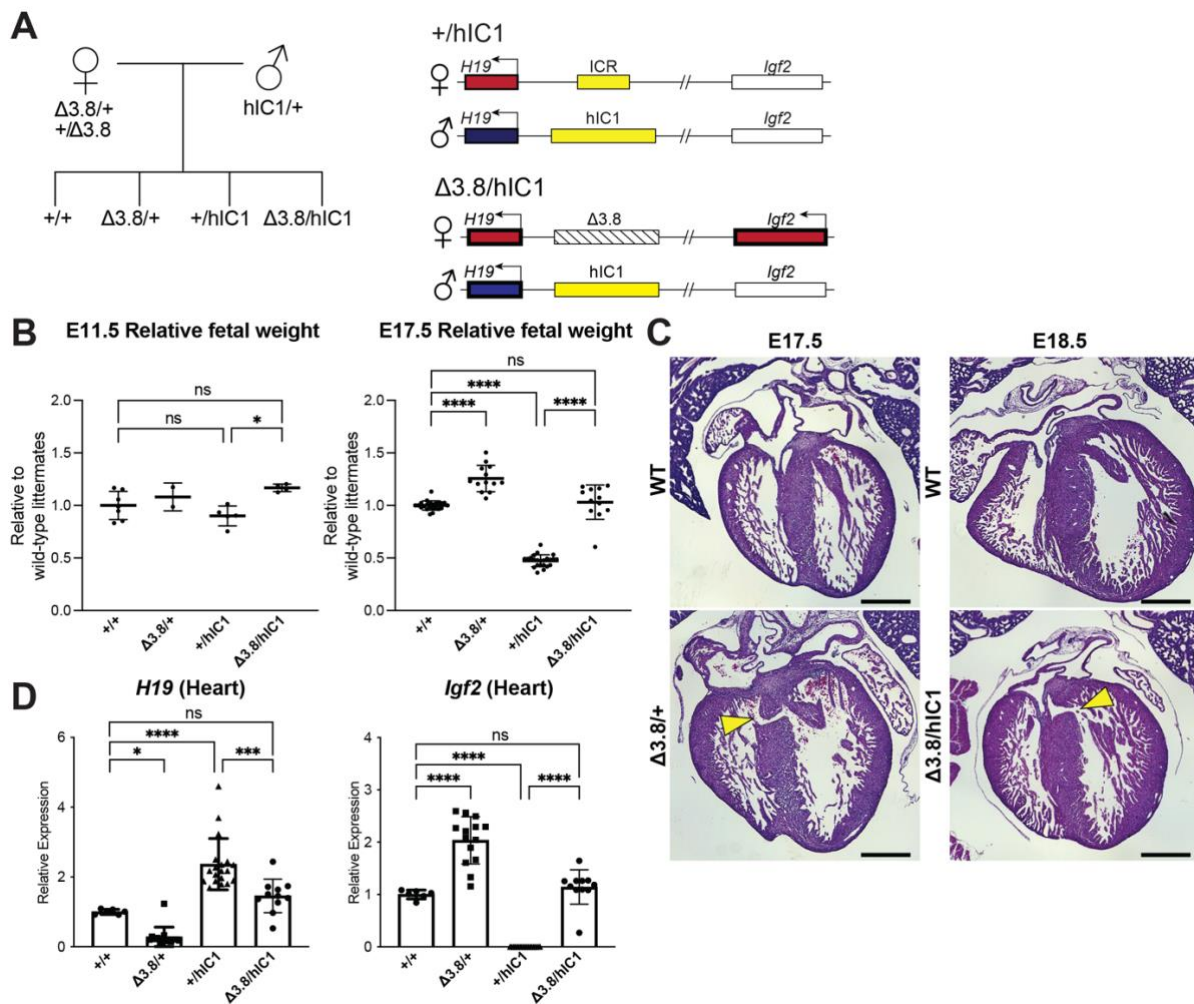

245

**Figure 5. Restoring *H19* and *Igf2* expression utilizing maternal *H19/Igf2* ICR deletion.**

(A) A schematic representation of the offspring produced when  $\Delta 3.8$  heterozygous female and  $hIC1/+$  male mice are mated is depicted.  $\Delta 3.8/hIC1$  embryos are expected to show activation of maternal *Igf2* expression as well as paternal *H19* expression. (B) Relative fetal weights of wild-type,  $\Delta 3.8/+$ ,  $+/hIC1$ , and  $\Delta 3.8/hIC1$  embryos at E11.5 and E17.5, normalized to the average body weight of wild-type littermates (mean  $\pm$  SD). 2 E11.5 and 10 E17.5 litters are presented. (C) Representative cross-sections of E17.5  $\Delta 3.8/+$  and E18.5  $\Delta 3.8/hIC1$  embryonic hearts with VSDs (yellow arrows), stained with hematoxylin and eosin. Sections from wild-type littermates are shown together for comparison. The E17.5 wild-type sample is male, the rest are female. Scale bars = 500  $\mu$ m. (D) Relative total expression of *H19* and *Igf2* in E17.5 wild-type,  $\Delta 3.8/+$ ,  $+/hIC1$ , and  $\Delta 3.8/hIC1$  hearts (mean  $\pm$  SD). (B, D) Each data point represents an individual conceptus from different litters. One-way ANOVA with Tukey's multiple comparisons test was used with \* $P < 0.05$ , \*\*\* $P < 0.001$ , \*\*\*\* $P < 0.0001$  and ns = not significant.

## 246 **Transcriptomic analysis of cardiac endothelial cells with various *H19/Igf2* expression**

247 Severe cardiac phenotypes associated with paternal *hIC1* transmission prompted us to question  
248 the mechanism of how dysregulated *H19/Igf2* causes such developmental defects. The paternal *hIC1*-  
249 associated cardiac phenotypes were observed as early as E12.5 when AV cushion fusion is delayed in  
250 developing hearts (Figure 2B), making E12.5 an optimal time point to identify the key pathways of valve  
251 development and cardiac septation that are disrupted by *H19/Igf2* dysregulation. Endothelial and  
252 endothelial-derived cells comprise the majority population in the AV cushion and majority non-myocyte  
253 population of the ventricular septum at E12.5 (Von Gise & Pu, 2012). Moreover, both *H19* and *Igf2* are  
254 strongly expressed in the endocardial layer of developing heart (García-Padilla et al., 2019). Therefore,  
255 transcriptomic analysis was performed on cardiac endothelial cells of each mutant.

256 CD31+ cardiac endothelial cells from E12.5 wild-type, *+hIC1*,  $\Delta H19/+$ ,  $\Delta H19/hIC1$ ,  $\Delta 3.8/+$ ,  
257 and  $\Delta 3.8/hIC1$  embryos were collected for RNA sequencing. First, we confirmed that these 6 groups  
258 show gradual alteration of *H19/Igf2* expression (Figure 6A), which enabled us to generate multiple  
259 comparisons relative to *H19* and *Igf2* levels and potentially enabling attribution of phenotypes to *H19* or  
260 *Igf2*. Notably, *H19/Igf2* expression was indistinguishable in the wild-type and  $\Delta 3.8/hIC1$  samples.  
261 Additionally, there were no sex-specific differences in *H19/Igf2* expression across all the groups.

262 To elucidate candidate genes and cellular processes in conferring the paternal *hIC1*-specific  
263 cardiac phenotypes, we compared *+hIC1* and wild-type samples. This comparison resulted in 224  
264 significant differentially expressed genes (DEGs) (Figure 6B, left). Gene ontology (GO) analysis revealed  
265 that pathways related to proliferation and remodeling of endothelial and epithelial cells are enriched in  
266 these DEGs (Figure 6B, right) (Mi et al., 2019). Notably, genes involved in extracellular matrix (ECM)  
267 and specifically, collagen matrix production, were differentially enriched in E12.5 *+hIC1* samples;  
268 consistent with increased collagen in the E17.5 *+hIC1* hearts, as confirmed through immunofluorescence  
269 staining (Figure 6C, Supplemental Figure 6A and B). Thus, differential gene expression in the presence of  
270 paternal *hIC1* was evidenced by E12.5 and correlated with histological consequences persisting through  
271 gestation.

272           Because cardiac phenotypes were indistinguishable between males and females, we next used  
273 same-sex comparisons between  $+hIC1$  and wild-type to identify the  $hIC1$ -specific DEGs that are  
274 significant in both males and females (Figure 6D, left and Supplemental Figure 6C). The 25 genes that  
275 overlapped between male and female  $+hIC1$ -specific DEGs included *Col14a1*, which was upregulated in  
276  $+hIC1$ , emphasizing the importance of collagen-related ECM in  $hIC1$ -associated cardiac defects. The  
277 expression pattern of these 25 genes across all samples clustered  $+hIC1$  and  $\Delta H19/hIC1$ , the two groups  
278 with the most severe cardiac defects and perinatal lethality (Figure 6D, right). Although the number of  
279  $+hIC1$ -specific DEGs largely differed between males and females, there was no sex-specific bias on the  
280 X chromosome (Supplemental Figure 6D).

281           To separate the effect of *Igf2* depletion from that of *H19* overexpression, we utilized  $\Delta H19/hIC1$   
282 samples. Consistent with previous observations from E17.5 hearts (Figure 4F),  $\Delta H19/hIC1$  endothelial  
283 cells exhibited low *Igf2*, but *H19* expression was not significantly different from wild-type (Supplemental  
284 Figure 7A). Thus,  $\Delta H19/hIC1$  samples were compared to  $+hIC1$  to clarify the sole effect of *H19*  
285 overexpression. Here, 46 DEGs were identified (Supplemental Figure 7B), which were enriched in  
286 vascular endothelial cell proliferation pathways (Supplemental Figure 7C). Surprisingly, although  
287 physiologically similar to  $+hIC1$ , the  $\Delta H19/hIC1$  transcriptome was quite different from that of  $+hIC1$ .  
288 Compared to wild-type,  $\Delta H19/hIC1$  only had 23 DEGs (Supplemental Figure 7A), in contrast to  $+hIC1$   
289 showing more than 200 DEGs compared to wild-type (Figure 6B, left). This result underscores the  
290 overwhelming effect of increased *H19* in transcriptomic regulation.

291           To identify the genes whose expression is solely affected by *H19*, we compared  $+hIC1$ ,  
292  $\Delta H19/hIC1$ , and  $\Delta H19/+$  endothelial cells. Among 224 genes that are differentially expressed in  $+hIC1$   
293 endothelial cells relative to wild-type, 15 genes are also differentially expressed in  $\Delta H19/hIC1$  samples,  
294 suggesting that these 15 genes were affected by the loss of *Igf2* rather than increased *H19*. Among the  
295 remaining 209 DEGs that are not altered in  $\Delta H19/hIC1$  samples, only *Fgf10* and *H19* were also  
296 differentially expressed in  $\Delta H19/+$  endothelial cells compared to wild-type. *Fgf10*, a key regulator of

297 cardiac fibroblast development, mediates communication between cardiac progenitor cells and regulates  
298 cardiac myocyte proliferation (Hubert et al., 2018; Vega-Hernández et al., 2011). Consistently, *Fgf10* null  
299 mouse embryos showed abnormal cardiac morphology with reduced heart size and thinned ventricular  
300 wall (Rochais et al., 2014; Vega-Hernández et al., 2011). In our samples, *Fgf10* is upregulated when *H19*  
301 is deleted and downregulated upon *H19* overexpression, linking *H19* and *Fgf10* closely in the context of  
302 cardiac development. Additionally, Gene Set Enrichment Analysis (GSEA) revealed that the set of  
303 imprinted genes (BRIDEAU\_IMPRINTED\_GENES) including *Cdkn1c*, *Dlk1* and *Gatm* was  
304 differentially enriched in *+hIC1* samples (Supplemental Figure 8A) (Mootha et al., 2003; Subramanian et  
305 al., 2005). The same set of genes was also differentially enriched in  $\Delta H19/+$  samples (Supplemental  
306 Figure 8B), but not  $\Delta H19/hIC1$  (Supplemental Figure 8C), underscoring a role for *H19* as a master  
307 regulator of the imprinted gene network (IGN) (Gabory et al., 2010).

308 We then analyzed  $\Delta 3.8/hIC1$  samples to identify cellular processes that are required to rescue the  
309 paternal *hIC1*-associated lethality, as  $\Delta 3.8/hIC1$  mice are fully viable with occasionally observed VSD.  
310  $\Delta 3.8/hIC1$  had only two DEGs compared to wild-type (Figure 6E). However, the *Shh* expression was  
311 only detected in two wild-type samples, suggesting that *Shh* did not have significant affect in the  
312 development of our wild-type and  $\Delta 3.8/hIC1$  cardiac endothelial cells at this stage. In contrast, 487 genes  
313 were differentially expressed in  $\Delta 3.8/hIC1$  compared to *+hIC1* (Supplemental Figure 9A). Within these  
314 DEGs, we wanted to clarify the genes that were likely involved in restoring viability. The 487 DEGs  
315 between *+hIC1* and  $\Delta 3.8/hIC1$  were compared to the DEGs between *+hIC1* and wild-type to filter  
316 genes that are commonly affected in both comparisons (Figure 6F, left). GO analysis showed that the 116  
317 overlapping genes are associated with endothelial/epithelial cell proliferation and remodeling  
318 (Supplemental Figure 9B), emphasizing the importance of the proper regulation of these pathways in the  
319 rescued viability of  $\Delta 3.8/hIC1$  embryos. The expression pattern of these 116 genes clustered *+hIC1* and  
320  $\Delta H19/hIC1$ , implicating these genes in the perinatal lethality characteristic of these two groups (Figure  
321 6F, right).

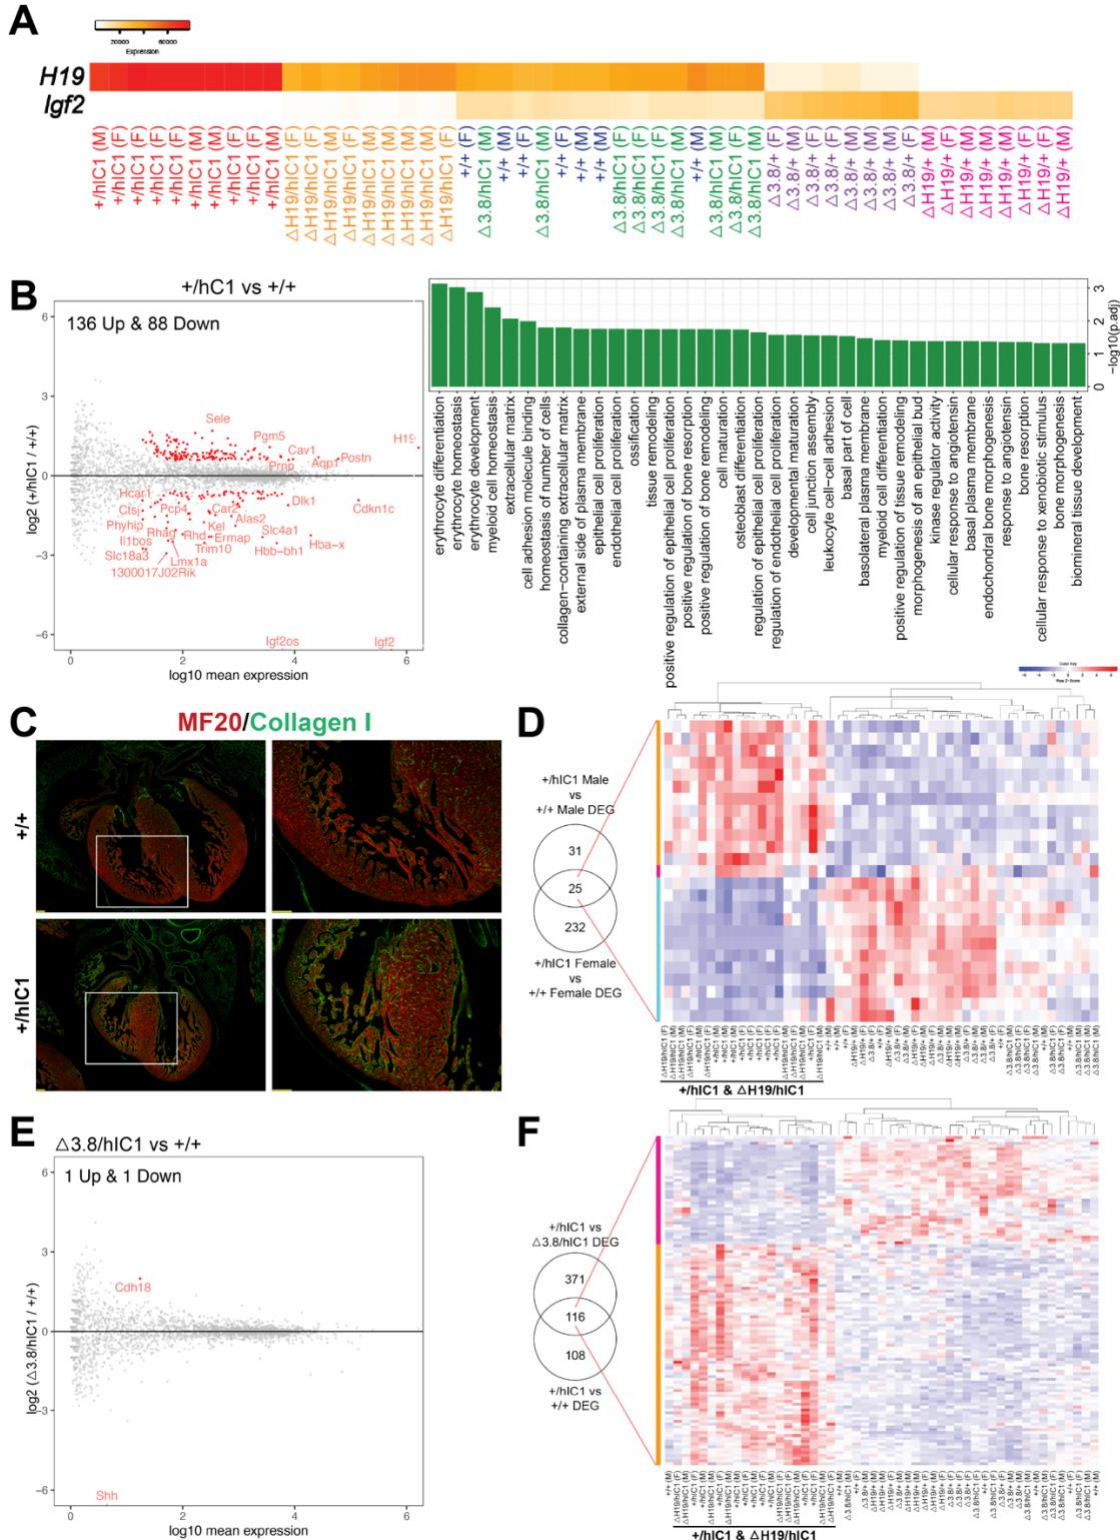

Figure 6. Transcriptomic analysis of E12.5 cardiac endothelial cells from wild-type and mutant embryos.

322

323

(A) A gradient *H19* and *Igf2* expression levels are depicted in E12.5 wild-type, *+hIC1*,  $\Delta H19/+$ ,  $\Delta H19/hIC1$ ,  $\Delta 3.8/+$  and  $\Delta 3.8/hIC1$  cardiac endothelial cells. M: Male, F: Female. (B) (Left) Comparison between *+hIC1* and the wild-type samples with a volcano plot shows 224 DEGs between *+hIC1* and the wild-type samples. (Right) GO pathways that are enriched for the 224 DEGs. (C) Immunofluorescence staining for MF20 (red) and collagen (green) on E17.5 wild-type and *+hIC1* hearts. Images on the right are enlarged from the boxed area of images on the left. Scale bars = 100  $\mu\text{m}$ . (D) Expression pattern of 25 genes that are differentially expressed in both male and female *+hIC1* samples is compared to wild-type. (E) A volcano plot represents 2 DEGs between  $\Delta 3.8/hIC1$  and the wild-type samples. (F) Expression pattern of 116 genes that are commonly differentially expressed in *+hIC1* compared to the wild-type and  $\Delta 3.8/hIC1$  samples.

324

## 325 Discussion

326 In this study, we report that the overexpression of *H19* combined with *Igf2* depletion leads to  
327 severe morphological defects in the heart and placenta, which are likely to be involved with the perinatal  
328 lethality and restricted growth of SRS mouse models. Genetically correcting *H19* was not sufficient to  
329 fully rescue the developmental defects, indicating that the SRS-like phenotypes of paternal *hIC1*  
330 transmission are not solely attributable to *H19* overexpression. Unexpectedly, although moderately  
331 adjusting both *H19* and *Igf2* rescued the lethality, septal defects persisted in some of the  $\Delta 3.8/hIC1$   
332 embryos, suggesting that cardiac development is extremely sensitive to the dosage of *H19* and *Igf2*. Our  
333 transcriptomic profiling of cardiac endothelial cells with various levels of *H19* and *Igf2* expression  
334 uncovers critical pathways driven by *H19* and *Igf2* that are important for cardiac structure formation. The  
335 result suggests that the regulation of ECM and proliferation of endothelial cells are tightly regulated by  
336 *H19* and *Igf2*, and potentially responsible for the paternal *hIC1*-associated cardiac defects.

337 The function of *H19* in cardiac development is understudied even though the expression of *H19* is  
338 robust in the developing endocardium and epicardium throughout gestation (García-Padilla et al., 2019).  
339 Abnormal *H19/Igf2* expression in *+hIC1* hearts disrupted AV cushion fusion, ventricular septation and  
340 valve formation processes with variable penetrance. These events require properly established ECM,  
341 which accommodates endothelial-mesenchymal transition, cell proliferation, and cell-cell adhesion in

342 developing hearts (Kruithof et al., 2007; Sullivan & Black, 2013; Von Gise & Pu, 2012). In adult murine  
343 hearts, where *H19* has been well implicated in cardiac fibrosis and remodeling (Greco et al., 2016; Hobuß  
344 et al., 2020; Lee et al., 2011; Wang et al., 2021), *H19* overexpression led to increased ECM and fibrosis  
345 markers after myocardial injury, while deleting *H19* resulted in downregulated ECM genes (Choong et  
346 al., 2019). In our *+hIC1* endothelial cells, the expression of several key ECM genes such as *Periostin*  
347 (*Postn*) (Snider, 2009; Sullivan, 2013), *Col14a1*, and *Adamts17* (Hubmacher, 2015) was significantly  
348 upregulated compared to wild-type cells. Combined with increased collagen in E17.5 *+hIC1* hearts  
349 (Figure 6C), we hypothesize that failing to establish proper ECM contributes significantly to the *+hIC1*-  
350 associated cardiac defects during development. Additionally, regulators of cell proliferation, including  
351 *E2f5*, *Trabd2b*, and *Septin4*, and genes associated with inflammation such as *Sele* and *Cd200* were also  
352 differentially expressed in *+hIC1* samples. Overall, this work provides some hints regarding the potential  
353 mechanism underlying how increased *H19* expression disrupts normal cardiac development.

354         In contrast to the less well understood role for *H19*, *Igf2* is the main growth factor in the  
355 developing ventricular wall. Similar to *H19*, *Igf2* is highly expressed in the developing cardiac  
356 endocardium and epicardium from early gestation (Shen et al., 2015) before ventricular septation is  
357 completed (Savolainen et al., 2009). Deletion of *Igf2* and its receptors caused decreased cardiomyocyte  
358 proliferation and ventricular hypoplasia, suggesting that *Igf2* is the major regulator of ventricular wall  
359 thickening (Li et al., 2011; Shen et al., 2015). Additionally, the interventricular septum is comprised of  
360 both mesenchymal and muscular components (Penny & Vick, 2011; Spicer et al., 2014), and a reduction  
361 in cardiomyocyte proliferation can lead to VSD (Snider & Conway, 2011). Thus, the lack of *Igf2*, a  
362 growth promoter for cardiomyocytes, could have contributed to the septal defects observed in *+hIC1* and  
363  $\Delta H19/hIC1$  hearts. However, the thinned myocardium in *Igf2* knockout mouse embryos was resolved by  
364 birth, resulting in normal cardiac morphology in neonates (Shen et al., 2020). In contrast, ventricular wall  
365 thinning and septal defects in *+hIC1* and  $\Delta H19/hIC1$  hearts were aggravated towards the end of  
366 gestation, indicating that these phenotypes are not exclusively attributable to the loss of *Igf2* expression.

367 Recovery of *Igf2* expression in  $\Delta 3.8/hIC1$  hearts rescued ventricular hypoplasia, consistent with  
368 previous findings (Li et al., 2011; Shen et al., 2015). In contrast, septal defects persist in some  $\Delta 3.8/+$   
369 and  $\Delta 3.8/hIC1$  embryos. Because *Igf2* expression varied substantially among  $\Delta 3.8/+$  and  $\Delta 3.8/hIC1$   
370 hearts (Figure 5D), we hypothesize that the varying penetrance of septal defects in these hearts reflects  
371 the range of *H19/Igf2* levels. The only upregulated gene in  $\Delta 3.8/hIC1$  endothelial cells compared to wild-  
372 type was *Cadherin 18 (Cdh18)* (Figure 6E), which was also upregulated in  $\Delta 3.8/+$  samples compared to  
373 wild-type (Supplemental Figure 9C) and clinically reported to be mutated in CHDs including VSD (Chen  
374 et al., 2018; Soemedi et al., 2012). Although we and others showed that restoring *Igf2* successfully  
375 rescues the growth restriction in SRS-like mouse models (Han et al., 2010; Liao et al., 2021), septal  
376 defects caused by *H19* and *Igf2* dysregulation are reported for the first time in this study. Our data provide  
377 evidence that ventricular septation may be regulated separately from the ventricular wall thickening, and  
378 that both events are extremely sensitive to the level of *H19* and *Igf2* expression. In humans, VSDs were  
379 found in SRS patients with IC1 hypomethylation (Ghanim et al., 2013) and a patient carrying  
380 chromosomal gain of chr11p15 (Serra et al., 2012). Thus, the VSD observed in our mouse models nicely  
381 models the SRS-associated CHD in human patients. It should be noted, however, that mice are often more  
382 susceptible to VSDs than humans. Mice with VSDs show a higher neonatal mortality rate, possibly due to  
383 the higher heart rates and relatively larger size of VSD lesions (Snider & Conway, 2011). Additionally,  
384 cardiac defects that are lethal in mice can lead to spontaneous miscarriages in humans due to longer  
385 human gestation, making it difficult to observe human infants with similar defects.

386 Linked through fetoplacental blood circulation, the heart and placenta are closely connected  
387 under the cardiac-placental axis, which is crucial for fetal growth and viability (Barak et al., 2019;  
388 Maslen, 2018). Both organs are responsible for supplying nutrients and oxygen for developing fetuses,  
389 and placental and cardiac defects are often coupled in mouse models (Perez-Garcia et al., 2018) and  
390 humans (Matthiesen et al., 2016; Rychik et al., 2018). Placental maintenance of a normoxic fetal  
391 environment is vital for cardiac morphogenesis, and hypoxia can lead to severe defects emerging  
392 especially in cushions and septa (Dor et al., 2001). Epicardial *Igf2* expression in developing ventricles is



393 induced by a normoxic environment that is dependent on the placental function (Shen et al., 2015), while  
394 *H19* is upregulated under hypoxic conditions in mouse cardiomyocytes (Choong et al., 2019). This  
395 suggests that *H19* and *Igf2* are important mediators of the interaction between heart and placenta.  
396 Consistent with previous reports, gene sets of which expression is altered under hypoxic conditions  
397 (HALLMARK\_HYPOXIA, GROSS\_HYPOXIA\_VIA\_HIF1A\_DN) are differentially enriched in our  
398 *+hIC1* endothelial cells compared to wild-type (Supplemental Figure 10). As the heart and placenta are  
399 responsible for meeting the fetal demand for nutrients and oxygen, the malfunction of these two organs  
400 would severely constrain embryonic growth. Therefore, the precise role of *H19* and *Igf2* in cardiac-  
401 placental communication needs to be clarified to understand how the SRS-related growth restriction is  
402 induced by IC1 hypomethylation.

403         The labyrinth, where *+hIC1* placentas show abnormal vasculature morphology and thrombosis,  
404 serves as a prime location for maternal-fetal blood exchange (Woods et al., 2018). Placental thrombosis  
405 can be caused by defective labyrinth integrity, and diminished labyrinth function could limit the  
406 nutritional and oxygen supply for a fetus, which can, in turn, lead to hypoxia and growth restriction. Both  
407 *H19* and *Igf2* are highly expressed in fetoplacental endothelial cells in the labyrinth (Aykroyd et al., 2022;  
408 Sandovici et al., 2022). Genetically depleting *Igf2* expression in the epiblast lineage led to decreased  
409 labyrinth size and caused the formation of thrombi in the labyrinth, although the lesions were smaller in  
410 size than those observed in *+hIC1* placentas (Sandovici et al., 2022). Depletion of the placental-specific  
411 *Igf2* transcript in mice resulted in a smaller labyrinth and fetal growth restriction (Constância et al., 2002;  
412 Sibley et al., 2004), although these mice showed an increased fetal to placental weight ratio, which was  
413 decreased in *+hIC1* mice. This contrasting result could be explained by the effect of the increased *H19*  
414 expression in *+hIC1* mice. *H19* regulates vascular endothelial growth factor (VEGF) in human  
415 endothelial cells *in vitro* (Conigliaro et al., 2015), which is involved in placental angiogenesis,  
416 specifically for the branching of fetoplacental vessels beginning at mid-gestation (Woods et al., 2018).  
417 Additionally, *H19* is highly expressed in trophoblasts (Marsh & Belloch, 2020; Poirier et al., 1991), and  
418 disrupted trophoblast development leads to defective vascular branching in the labyrinth and restricted

419 fetal growth (Ueno et al., 2013). Thus, it is possible that the morphological anomalies observed in the  
420 +/*hICI* placenta are exaggerated by abnormal *H19* expression in trophoblasts. Transcriptomic analysis of  
421 fetoplacental endothelial cells from our mouse models would help us understand the role of *H19/Igf2* in  
422 placental development. Moreover, generating a tissue-specific *hICI* mouse model, if possible, would  
423 allow us to determine the causal relationship between cardiac and placental phenotypes.

424 In summary, we provide evidence that the proper dosage of *H19* and *Igf2* is essential for normal  
425 cardiac and placental development. Investigation of the role of *H19* and *Igf2* in the cardiac-placental axis  
426 will enable a better understanding of how paternal *hICI* transmission leads to the SRS-like growth  
427 restriction and perinatal lethality. As many patients with SRS exhibit DNA methylation mosaicism, the  
428 distribution of the epimutation, which reflects the severity of patient symptoms, varies. This work  
429 provides insight into identifying organs that are most sensitive to *H19* and *Igf2* dysregulation, which  
430 would allow us to develop early intervention methods for critical SRS pathologies with such variabilities.

431

## 432 **Materials and Methods**

433 **Animal studies.** All studies were approved by the Institutional Animal Care and Use Committee  
434 (IACUC) at the University of Pennsylvania. *hICI* (Hur et al., 2016) and  $\Delta 3.8$  (Thorvaldsen et al., 2002,  
435 2006) mouse models were previously described. Generation of  $\Delta H19$  line is described in Supplemental  
436 Information. Timed breeding was performed as previously described (SanMiguel et al., 2018). Vaginal  
437 sperm plugs were checked to calculate the age, and the day of the plug was marked as E0.5. Visual  
438 staging confirmed the embryonic days at the time of dissection. All mice were maintained on C57BL/6  
439 background for more than 10 generations if not noted otherwise. Genotyping was performed as described  
440 in Supplemental Information.

441 **Gene Expression Analysis.** Mouse tissues were ground using pestles, syringes and needles in either  
442 TRIzol (Thermo Fisher scientific, Waltham, MA) or RLP buffer included in RNeasy Mini kit (Qiagen,  
443 Hilden, Germany). RNA was isolated according to the manufacturer's instructions. cDNA synthesis,  
444 qRT-PCR, and allele-specific expression analysis was performed as previously described (Hur et al.,

445 2016). Primers and PCR conditions are listed in Supplemental Table 1. RNA Sequencing library  
446 preparation and analysis are described in Supplemental Information. Total expression levels of miR-675-  
447 3p and miR-675-5p were determined relative to snoRNA202 by using a separate RT kit (TaqMan  
448 MicroRNA Reverse Transcription Kit, Thermo Fisher Scientific), qRT-PCR primers (Assay Id 001232,  
449 001941, 001940, Thermo Fisher Scientific), and a PCR master mix (TaqMan Universal PCR Master Mix,  
450 catalog number 4304437, Thermo Fisher Scientific) according to manufacturer's protocol.

451 **Histological analysis.** Mouse heart and placenta samples were collected in cold PBS, fixed overnight in  
452 4% paraformaldehyde or 10% phosphate-buffered formalin and processed through ethanol dehydration.  
453 Tissues were paraffin-embedded and sectioned for further staining analysis. Hematoxylin and eosin  
454 staining was performed using a standard protocol. Immunohistochemistry for MF20 (Developmental  
455 Studies Hybridoma Bank, Iowa City, IA) and Collagen I (cat# ab34710, Abcam, Cambridge, UK) was  
456 performed with primary antibody incubations overnight at 4°C. Prior to antibody incubation, antigen  
457 retrieval with citrate buffer was performed, followed by a 1 hour block in 10% normal serum. DAPI  
458 (cat#32670-5MG-F, Sigma-Aldrich, St. Louis, MO) was used as a counter stain, and slides were mounted  
459 with VECTASHILD (Vector, Burlingame, CA). Images were taken on a Leica DMI8S widefield  
460 microscope. Placental CD34 staining and Periodic acid-Schiff (PAS) staining was previously described  
461 (Vrooman et al., 2020). The thickness of ventricular wall was measured on hematoxylin-eosin-stained  
462 heart sections using Adobe Photoshop. A minimum of 3 distinct sections were quantified for each mouse  
463 of each genotype in a blinded manner. Placental Jz/Lb ratio was measured using FIJI (ImageJ v2.0.0,  
464 Schindelin et al., 2012) in a blinded manner. CD34 stained placental sections were digitally scanned using  
465 Aperio VERSA 200 platform in Comparative Pathology Core (CPC) at School of Veterinary Medicine at  
466 the University of Pennsylvania. Images were analyzed via Aperio Microvessel Analysis algorithm as  
467 previously described (Vrooman et al., 2020).

468 **Statistical Analysis.** Differences between two groups were evaluated using Student's t-test. For three or  
469 more groups, ordinary one-way analysis of variance (ANOVA), followed up with Tukey's multiple  
470 comparisons test, was used. Two-sided Fisher's exact test was used to compare the occurrence of the  
471 thrombi in the wild-type and *+hICI* placentas. All analyses were performed using GraphPad Prism  
472 software. \* $P < 0.05$ , \*\* $P < 0.01$ , \*\*\* $P < 0.001$ , \*\*\*\* $P < 0.0001$ , n.s. = not significant.

473

#### 474 **Acknowledgments**

475 Authors would like to express gratitude to Christopher Krapp, Lisa Vrooman, Joel Rurik, Olga Smirnova,  
476 Jonathan Schug, Klaus Kaestner, and Colin Conine for their guidance on this study. This work was  
477 supported by National Institutes of Health grant GM-051279-28 and R35HL140018-05, National Institute  
478 of Arthritis and Musculoskeletal and Skin Diseases grant 5T32AR053461.

479

#### 480 **Author Contributions**

481 S.C. and M.S.B. designed the study. S.C. and J.L.T. performed experiments and maintained mouse lines.  
482 S.K.H. generated  $\Delta HI9$  allele. S.C., D.F., J.A.E. and L.L. evaluated cardiac histology. E.A.R. and X.C.  
483 evaluated placental histology. S.C. and Y.L. analyzed RNA-seq data. N.A.L. assisted in experiments for  
484 revision. S.C. and M.S.B. wrote the manuscript with input from all authors.

485

#### 486 **Competing Interests**

487 The authors declare no competing interests.

488

#### 489 **Data Availability**

490 RNA sequencing data are deposited in GEO database under the accession number GSE199377.

491

#### 492 **References**

493 Abi Habib, W., Brioude, F., Azzi, S., Salem, J., Das Neves, C., Personnier, C., Chantot-Bastarud, S.,

- 494 Keren, B., Le Bouc, Y., Harbison, M. D., & Netchine, I. (2017). 11p15 ICR1 Partial Deletions  
495 Associated with IGF2/H19 DMR Hypomethylation and Silver–Russell Syndrome. *Human Mutation*.  
496 <https://doi.org/10.1002/humu.23131>
- 497 Andrews, S., Krueger, F., Seifert-Pichon, A., Biggins, F., & Wingett, S. (2015). *FastQC. A quality*  
498 *control tool for high throughput sequence data. Babraham Bioinformatics*. Babraham Institute.
- 499 Aykroyd, B. R. L., Tunster, S. J., & Sferruzzi-Perri, A. N. (2022). Loss of imprinting of the Igf2-H19  
500 ICR1 enhances placental endocrine capacity via sex-specific alterations in signalling pathways in  
501 the mouse . *Development*, *149*(1). <https://doi.org/10.1242/dev.199811>
- 502 Barak, Y., Hemberger, M., & Sucov, H. M. (2019). Phases and Mechanisms of Embryonic  
503 Cardiomyocyte Proliferation and Ventricular Wall Morphogenesis. *Pediatric Cardiology*, *40*(7),  
504 1359–1366. <https://doi.org/10.1007/s00246-019-02164-6>
- 505 Barlow, D. P., & Bartolomei, M. S. (2014). Genomic imprinting in mammals. *Cold Spring Harbor*  
506 *Perspectives in Biology*. <https://doi.org/10.1101/cshperspect.a018382>
- 507 Begemann, M., Zirn, B., Santen, G., Wirthgen, E., Soellner, L., Büttel, H.-M., Schweizer, R., van  
508 Workum, W., Binder, G., & Eggermann, T. (2015). Paternally Inherited IGF2 Mutation and Growth  
509 Restriction . *New England Journal of Medicine*, *373*(4). <https://doi.org/10.1056/nejmoa1415227>
- 510 Borensztein, M., Viengchareun, S., Montarras, D., Journot, L., Binart, N., Lombès, M., & Dandolo, L.  
511 (2012). Double Myod and Igf2 inactivation promotes brown adipose tissue development by  
512 increasing Prdm16 expression. *FASEB Journal*. <https://doi.org/10.1096/fj.12-208496>
- 513 Chang, S., & Bartolomei, M. S. (2020). Modeling human epigenetic disorders in mice: Beckwith-  
514 Wiedemann syndrome and Silver-Russell syndrome. In *DMM Disease Models and Mechanisms*  
515 (Vol. 13, Issue 5). <https://doi.org/10.1242/dmm.044123>
- 516 Chen, C. P., Chang, S. Y., Lin, C. J., Chern, S. R., Wu, P. S., Chen, S. W., Lai, S. T., Chuang, T. Y.,  
517 Chen, W. L., Yang, C. W., & Wang, W. (2018). Prenatal diagnosis of a familial 5p14.3-p14.1  
518 deletion encompassing CDH18, CDH12, PMCHL1, PRDM9 and CDH10 in a fetus with congenital  
519 heart disease on prenatal ultrasound. *Taiwanese Journal of Obstetrics and Gynecology*, *57*(5).

- 520 <https://doi.org/10.1016/j.tjog.2018.08.023>
- 521 Choong, O. K., Chen, C. Y., Zhang, J., Lin, J. H., Lin, P. J., Ruan, S. C., Kamp, T. J., & Hsieh, P. C. H.  
522 (2019). Hypoxia-induced H19/YB-1 cascade modulates cardiac remodeling after infarction.  
523 *Theranostics*, 9(22). <https://doi.org/10.7150/thno.35218>
- 524 Conigliaro, A., Costa, V., Lo Dico, A., Saieva, L., Buccheri, S., Dieli, F., Manno, M., Raccosta, S.,  
525 Mancone, C., Tripodi, M., De Leo, G., & Alessandro, R. (2015). CD90+ liver cancer cells modulate  
526 endothelial cell phenotype through the release of exosomes containing H19 lncRNA. *Molecular*  
527 *Cancer*, 14(1), 1–11. <https://doi.org/10.1186/s12943-015-0426-x>
- 528 Constância, M., Hemberger, M., Hughes, J., Dean, W., Ferguson-Smith, A., Fundele, R., Stewart, F.,  
529 Kelsey, G., Fowden, A., Sibley, C., & Reik, W. (2002). Placental-specific IGF-II is a major  
530 modulator of placental and fetal growth. *Nature*, 417(6892), 945–948.  
531 <https://doi.org/10.1038/nature00819>
- 532 DeChiara, T. M., Robertson, E. J., & Efstratiadis, A. (1991). Parental imprinting of the mouse insulin-like  
533 growth factor II gene. *Cell*. [https://doi.org/10.1016/0092-8674\(91\)90513-X](https://doi.org/10.1016/0092-8674(91)90513-X)
- 534 Dobin, A., Davis, C. A., Schlesinger, F., Drenkow, J., Zaleski, C., Jha, S., Batut, P., Chaisson, M., &  
535 Gingeras, T. R. (2013). STAR: Ultrafast universal RNA-seq aligner. *Bioinformatics*, 29(1).  
536 <https://doi.org/10.1093/bioinformatics/bts635>
- 537 Dor, Y., Camenisch, T. D., Itin, A., Fishman, G. I., McDonald, J. A., Carmeliet, P., & Keshet, E. (2001).  
538 A novel role for VEGF in endocardial cushion formation and its potential contribution to congenital  
539 heart defects. *Development*, 128(9). <https://doi.org/10.1242/dev.128.9.1531>
- 540 Drewell, R. A., Brenton, J. D., Ainscough, J. F. X., Barton, S. C., Hilton, K. J., Arney, K. L., Dandolo, L.,  
541 & Surani, M. A. (2000). Deletion of a silencer element disrupts H19 imprinting independently of a  
542 DNA methylation epigenetic switch. *Development*.
- 543 Eggermann, T., Buiting, K., & Temple, I. K. (2011). Clinical utility gene card for: Silver-Russell  
544 syndrome. *European Journal of Human Genetics*. <https://doi.org/10.1038/ejhg.2010.202>
- 545 Eisenberg, L. M., & Markwald, R. R. (1995). Molecular regulation of atrioventricular valvuloseptal

- 546 morphogenesis. In *Circulation Research* (Vol. 77, Issue 1). <https://doi.org/10.1161/01.RES.77.1.1>
- 547 Engel, N., West, A. G., Felsenfeld, G., & Bartolomei, M. S. (2004). Antagonism between DNA  
548 hypermethylation and enhancer-blocking activity at the H19 DMD is uncovered by CpG mutations.  
549 *Nature Genetics*. <https://doi.org/10.1038/ng1399>
- 550 Esquiliano, D. R., Guo, W., Liang, L., Dikkes, P., & Lopez, M. F. (2009). Placental Glycogen Stores are  
551 Increased in Mice with H19 Null Mutations but not in those with Insulin or IGF Type 1 Receptor  
552 Mutations. *Placenta*, 30(8). <https://doi.org/10.1016/j.placenta.2009.05.004>
- 553 Freschi, A., Del Prete, R., Pignata, L., Cecere, F., Manfredola, F., Mattia, M., Cobellis, G., Sparago, A.,  
554 Bartolomei, M. S., Riccio, A., & Cerrato, F. (2021). The number of the CTCF binding sites of the  
555 H19/IGF2:IG-DMR correlates with DNA methylation and expression imprinting in a humanized  
556 mouse model. *Human Molecular Genetics*, 30(16). <https://doi.org/10.1093/hmg/ddab132>
- 557 Freschi, A., Hur, S. K., Valente, F. M., Ideraabdullah, F. Y., Sparago, A., Gentile, M. T., Oneglia, A., Di  
558 Nucci, D., Colucci-D'Amato, L., Thorvaldsen, J. L., Bartolomei, M. S., Riccio, A., & Cerrato, F.  
559 (2018). Tissue-specific and mosaic imprinting defects underlie opposite congenital growth disorders  
560 in mice. *PLoS Genetics*. <https://doi.org/10.1371/journal.pgen.1007243>
- 561 Gabory, A., Jammes, H., & Dandolo, L. (2010). The H19 locus: Role of an imprinted non-coding RNA in  
562 growth and development. In *BioEssays*. <https://doi.org/10.1002/bies.200900170>
- 563 Gabory, A., Ripoche, M. A., Le Digarcher, A., Watrin, F., Ziyat, A., Forné, T., Jammes, H., Ainscough,  
564 J. F. X., Surani, M. A., Journot, L., & Dandolo, L. (2009). H19 acts as a trans regulator of the  
565 imprinted gene network controlling growth in mice. *Development*.  
566 <https://doi.org/10.1242/dev.036061>
- 567 García-Padilla, C., Domínguez, J. N., Aránega, A. E., & Franco, D. (2019). Differential chamber-specific  
568 expression and regulation of long non-coding RNAs during cardiac development. *Biochimica et*  
569 *Biophysica Acta - Gene Regulatory Mechanisms*, 1862(10), 194435.  
570 <https://doi.org/10.1016/j.bbagr.2019.194435>
- 571 Ghanim, M., Rossignol, S., Delobel, B., Irving, M., Miller, O., Devisme, L., Plennevaux, J. L.,

- 572 Lucidarme-Rossi, S., Manouvrier, S., Salah, A., Chivu, O., Netchine, I., & Vincent-Delorme, C.  
573 (2013). Possible association between complex congenital heart defects and 11p15 hypomethylation  
574 in three patients with severe Silver-Russell syndrome. *American Journal of Medical Genetics, Part*  
575 *A*, *161*(3), 572–577. <https://doi.org/10.1002/ajmg.a.35691>
- 576 Gicquel, C., Rossignol, S., Cabrol, S., Houang, M., Steunou, V., Barbu, V., Danton, F., Thibaud, N., Le  
577 Merrer, M., Burglen, L., Bertrand, A. M., Netchine, I., & Le Bouc, Y. (2005). Epimutation of the  
578 telomeric imprinting center region on chromosome 11p15 in Silver-Russell syndrome. *Nature*  
579 *Genetics*, *37*(9), 1003–1007. <https://doi.org/10.1038/ng1629>
- 580 Greco, S., Zaccagnini, G., Perfetti, A., Fuschi, P., Valaperta, R., Voellenkle, C., Castelvechio, S.,  
581 Gaetano, C., Finato, N., Beltrami, A. P., Menicanti, L., & Martelli, F. (2016). Long noncoding RNA  
582 dysregulation in ischemic heart failure. *Journal of Translational Medicine*, *14*(1), 1–14.  
583 <https://doi.org/10.1186/s12967-016-0926-5>
- 584 Haley, V. L., Barnes, D. J., Sandovici, I., Constancia, M., Graham, C. F., Pezzella, F., Bühnenmann, C.,  
585 Carter, E. J., & Hassan, A. B. (2012). Igf2 pathway dependency of the Trp53 developmental and  
586 tumour phenotypes. *EMBO Molecular Medicine*. <https://doi.org/10.1002/emmm.201101105>
- 587 Han, L., Szabó, P. E., & Mann, J. R. (2010). Postnatal survival of mice with maternal duplication of distal  
588 chromosome 7 induced by a Igf2/H19 imprinting control region lacking insulator function. *PLoS*  
589 *Genetics*. <https://doi.org/10.1371/journal.pgen.1000803>
- 590 Harris, L. K., & Westwood, M. (2012). Biology and significance of signalling pathways activated by  
591 IGF-II. *Growth Factors*, *30*(1), 1–12. <https://doi.org/10.3109/08977194.2011.640325>
- 592 Hobuß, L., Foinquinos, A., Jung, M., Kenneweg, F., Xiao, K., Wang, Y., Zimmer, K., Remke, J., Just, A.,  
593 Nowak, J., Schmidt, A., Pich, A., Mazlan, S., Reamon-Buettner, S. M., Ramos, G. C., Frantz, S.,  
594 Viereck, J., Loyer, X., Boulanger, C., ... Thum, T. (2020). Pleiotropic cardiac functions controlled  
595 by ischemia-induced lncRNA H19. *Journal of Molecular and Cellular Cardiology*, *146*(July 2019),  
596 43–59. <https://doi.org/10.1016/j.jmcc.2020.07.001>
- 597 Hubert, F., Payan, S. M., & Rochais, F. (2018). FGF10 Signaling in Heart Development, Homeostasis,



598 Disease and Repair. In *Frontiers in Genetics* (Vol. 9). <https://doi.org/10.3389/fgene.2018.00599>

599 Hur, S. K., Freschi, A., Ideraabdullah, F., Thorvaldsen, J. L., Luense, L. J., Weller, A. H., Berger, S. L.,  
600 Cerrato, F., Riccio, A., & Bartolomei, M. S. (2016). Humanized H19/Igf2 locus reveals diverged  
601 imprinting mechanism between mouse and human and reflects Silver-Russell syndrome phenotypes.  
602 *Proceedings of the National Academy of Sciences of the United States of America*.  
603 <https://doi.org/10.1073/pnas.1603066113>

604 Keniry, A., Oxley, D., Monnier, P., Kyba, M., Dandolo, L., Smits, G., & Reik, W. (2012). The H19  
605 lincRNA is a developmental reservoir of miR-675 that suppresses growth and Igf1r. *Nature Cell*  
606 *Biology*. <https://doi.org/10.1038/ncb2521>

607 Kochilas, L. K., Li, J., Jin, F., Buck, C. A., & Epstein, J. A. (1999). p57Kip2 expression is enhanced  
608 during mid-cardiac murine development and is restricted to trabecular myocardium. *Pediatric*  
609 *Research*, 45(5). <https://doi.org/10.1203/00006450-199905010-00004>

610 Kruithof, B. P. T., Krawitz, S. A., & Gaussin, V. (2007). Atrioventricular valve development during late  
611 embryonic and postnatal stages involves condensation and extracellular matrix remodeling.  
612 *Developmental Biology*, 302(1). <https://doi.org/10.1016/j.ydbio.2006.09.024>

613 Lee, J. H., Gao, C., Peng, G., Greer, C., Ren, S., Wang, Y., & Xiao, X. (2011). Analysis of transcriptome  
614 complexity through RNA sequencing in normal and failing murine hearts. *Circulation Research*,  
615 109(12), 1332–1341. <https://doi.org/10.1161/CIRCRESAHA.111.249433>

616 Li, P., Cavallero, S., Gu, Y., Chen, T. H. P., Hughes, J., Hassan, A. B., Brüning, J. C., Pashmforough, M.,  
617 & Sucov, H. M. (2011). IGF signaling directs ventricular cardiomyocyte proliferation during  
618 embryonic heart development. *Development*, 138(9), 1795–1805.  
619 <https://doi.org/10.1242/dev.054338>

620 Liao, J., Zeng, T. B., Pierce, N., Tran, D. A., Singh, P., Mann, J. R., & Szabó, P. E. (2021). Prenatal  
621 correction of IGF2 to rescue the growth phenotypes in mouse models of Beckwith-Wiedemann and  
622 Silver-Russell syndromes. *Cell Reports*, 34(6). <https://doi.org/10.1016/j.celrep.2021.108729>

623 Lopez, M. F., Dikkes, P., Zurakowski, D., & Villa-Komaroff, L. (1996). Insulin-like growth factor II

624 affects the appearance and glycogen content of glycogen cells in the murine placenta.  
625 *Endocrinology*, 137(5). <https://doi.org/10.1210/endo.137.5.8612553>

626 Love, M. I., Huber, W., & Anders, S. (2014). Moderated estimation of fold change and dispersion for  
627 RNA-seq data with DESeq2. *Genome Biology*, 15(12). <https://doi.org/10.1186/s13059-014-0550-8>

628 Marsh, B., & Blelloch, R. (2020). Single nuclei RNA-seq of mouse placental labyrinth development.  
629 *ELife*, 9. <https://doi.org/10.7554/eLife.60266>

630 Maslen, C. L. (2018). Recent advances in placenta-heart interactions. *Frontiers in Physiology*, 9(JUN), 1–  
631 9. <https://doi.org/10.3389/fphys.2018.00735>

632 Matthiesen, N. B., Henriksen, T. B., Agergaard, P., Gaynor, J. W., Bach, C. C., Hjortdal, V. E., &  
633 Østergaard, J. R. (2016). Congenital Heart Defects and Indices of Placental and Fetal Growth in a  
634 Nationwide Study of 924 422 Liveborn Infants. *Circulation*, 134(20), 1546–1556.  
635 <https://doi.org/10.1161/CIRCULATIONAHA.116.021793>

636 Mi, H., Muruganujan, A., Ebert, D., Huang, X., & Thomas, P. D. (2019). PANTHER version 14: More  
637 genomes, a new PANTHER GO-slim and improvements in enrichment analysis tools. *Nucleic Acids*  
638 *Research*, 47(D1). <https://doi.org/10.1093/nar/gky1038>

639 Mootha, V. K., Lindgren, C. M., Eriksson, K. F., Subramanian, A., Sihag, S., Lehar, J., Puigserver, P.,  
640 Carlsson, E., Ridderstråle, M., Laurila, E., Houstis, N., Daly, M. J., Patterson, N., Mesirov, J. P.,  
641 Golub, T. R., Tamayo, P., Spiegelman, B., Lander, E. S., Hirschhorn, J. N., ... Groop, L. C. (2003).  
642 PGC-1 $\alpha$ -responsive genes involved in oxidative phosphorylation are coordinately downregulated in  
643 human diabetes. *Nature Genetics*, 34(3). <https://doi.org/10.1038/ng1180>

644 Penny, D. J., & Vick, G. W. (2011). Ventricular septal defect. *The Lancet*, 377(9771), 1103–1112.  
645 [https://doi.org/10.1016/S0140-6736\(10\)61339-6](https://doi.org/10.1016/S0140-6736(10)61339-6)

646 Perez-Garcia, V., Fineberg, E., Wilson, R., Murray, A., Mazzeo, C. I., Tudor, C., Sienerth, A., White, J.  
647 K., Tuck, E., Ryder, E. J., Gleeson, D., Siragher, E., Wardle-Jones, H., Staudt, N., Wali, N., Collins,  
648 J., Geyer, S., Busch-Nentwich, E. M., Galli, A., ... Hemberger, M. (2018). Placentation defects are  
649 highly prevalent in embryonic lethal mouse mutants. *Nature*, 555(7697), 463–468.

- 650 <https://doi.org/10.1038/nature26002>
- 651 Poirier, F., Chan, C. T. J., Timmons, P. M., Robertson, E. J., Evans, M. J., & Rigby, P. W. J. (1991). The  
652 murine H19 gene is activated during embryonic stem cell differentiation in vitro and at the time of  
653 implantation in the developing embryo. *Development*, *113*(4).  
654 <https://doi.org/10.1242/dev.113.4.1105>
- 655 Rochais, F., Sturny, R., Chao, C. M., Mesbah, K., Bennett, M., Mohun, T. J., Bellusci, S., & Kelly, R. G.  
656 (2014). FGF10 promotes regional foetal cardiomyocyte proliferation and adult cardiomyocyte cell-  
657 cycle re-entry. *Cardiovascular Research*, *104*(3). <https://doi.org/10.1093/cvr/cvu232>
- 658 Rychik, J., Goff, D., McKay, E., Mott, A., Tian, Z., Licht, D. J., & Gaynor, J. W. (2018). Characterization  
659 of the Placenta in the Newborn with Congenital Heart Disease: Distinctions Based on Type of  
660 Cardiac Malformation. *Pediatric Cardiology*, *39*(6), 1165–1171. [https://doi.org/10.1007/s00246-](https://doi.org/10.1007/s00246-018-1876-x)  
661 [018-1876-x](https://doi.org/10.1007/s00246-018-1876-x)
- 662 Sandovici, I., Georgopoulou, A., Pérez-García, V., Hufnagel, A., López-Tello, J., Lam, B. Y. H.,  
663 Schiefer, S. N., Gaudreau, C., Santos, F., Hoelle, K., Yeo, G. S. H., Burling, K., Reiterer, M.,  
664 Fowden, A. L., Burton, G. J., Branco, C. M., Sferruzzi-Perri, A. N., & Constância, M. (2022). The  
665 imprinted Igf2-Igf2r axis is critical for matching placental microvasculature expansion to fetal  
666 growth. *Developmental Cell*, *57*(1), 63-79.e8. <https://doi.org/10.1016/j.devcel.2021.12.005>
- 667 SanMiguel, J. M., Abramowitz, L. K., & Bartolomei, M. S. (2018). Imprinted gene dysregulation in a  
668 Tet1 null mouse model is stochastic and variable in the germline and offspring. *Development*  
669 *(Cambridge)*, *145*(7). <https://doi.org/10.1242/dev.160622>
- 670 Savolainen, S. M., Foley, J. F., & Elmore, S. A. (2009). Histology atlas of the developing mouse heart  
671 with emphasis on E11.5 to E18.5. *Toxicologic Pathology*, *37*(4), 395–414.  
672 <https://doi.org/10.1177/0192623309335060>
- 673 Schindelin, J., Arganda-Carreras, I., Frise, E., Kaynig, V., Longair, M., Pietzsch, T., Preibisch, S.,  
674 Rueden, C., Saalfeld, S., Schmid, B., Tinevez, J. Y., White, D. J., Hartenstein, V., Eliceiri, K.,  
675 Tomancak, P., & Cardona, A. (2012). Fiji: An open-source platform for biological-image analysis.

- 676 In *Nature Methods* (Vol. 9, Issue 7). <https://doi.org/10.1038/nmeth.2019>
- 677 Serra, A., Eirich, K., Winkler, A. K., Mrasek, K., Ghring, G., Barbi, G., Cario, H., Schlegelberger, B.,  
678 Pokora, B., Liehr, T., Leriche, C., Henne-Bruns, D., Barth, T. F., & Schindler, D. (2012). Shared  
679 copy number variation in simultaneous nephroblastoma and neuroblastoma due to Fanconi anemia.  
680 *Molecular Syndromology*, 3(3), 120–130. <https://doi.org/10.1159/000341935>
- 681 Shen, H., Cavallero, S., Estrada, K. D., Sandovici, I., Kumar, S. R., Makita, T., Lien, C. L., Constancia,  
682 M., & Sucov, H. M. (2015). Extracardiac control of embryonic cardiomyocyte proliferation and  
683 ventricular wall expansion. *Cardiovascular Research*, 105(3), 271–278.  
684 <https://doi.org/10.1093/cvr/cvu269>
- 685 Shen, H., Gan, P., Wang, K., Darehzereshki, A., Wang, K., Ram Kumar, S., Lien, C. L., Patterson, M.,  
686 Tao, G., & Sucov, H. M. (2020). Mononuclear diploid cardiomyocytes support neonatal mouse heart  
687 regeneration in response to paracrine IGF2 signaling. *ELife*, 9, 1–24.  
688 <https://doi.org/10.7554/eLife.53071>
- 689 Sibley, C. P., Coan, P. M., Dean, W., Hughes, J., Smith, P., Reik, W., & Burton, G. J. (2004). *Regulates*  
690 *the Diffusional Exchange Characteristics of the Mouse Placenta*. 2.
- 691 Snider, P., & Conway, S. J. (2011). Probing human cardiovascular congenital disease using transgenic  
692 mouse models. In *Progress in Molecular Biology and Translational Science* (1st ed., Vol. 100).  
693 Elsevier Inc. <https://doi.org/10.1016/B978-0-12-384878-9.00003-0>
- 694 Soellner, L., Kraft, F., Sauer, S., Begemann, M., Kurth, I., Elbracht, M., & Eggermann, T. (2019). Search  
695 for cis-acting factors and maternal effect variants in Silver-Russell patients with ICR1  
696 hypomethylation and their mothers. *European Journal of Human Genetics*, 27(1).  
697 <https://doi.org/10.1038/s41431-018-0269-1>
- 698 Soemedi, R., Wilson, I. J., Bentham, J., Darlay, R., Töpf, A., Zelenika, D., Cosgrove, C., Setchfield, K.,  
699 Thornborough, C., Granados-Riveron, J., Blue, G. M., Breckpot, J., Hellens, S., Zwolinski, S.,  
700 Glen, E., Mamasoula, C., Rahman, T. J., Hall, D., Rauch, A., ... Keavney, B. D. (2012).  
701 Contribution of global rare copy-number variants to the risk of sporadic congenital heart disease.

- 702 *American Journal of Human Genetics*, 91(3). <https://doi.org/10.1016/j.ajhg.2012.08.003>
- 703 Spicer, D. E., Hsu, H. H., Co-Vu, J., Anderson, R. H., & Fricker, F. J. (2014). Ventricular septal defect.  
704 *Orphanet Journal of Rare Diseases*, 9, 144. <https://doi.org/10.1186/s13023-014-0144-2>
- 705 Subramanian, A., Tamayo, P., Mootha, V. K., Mukherjee, S., Ebert, B. L., Gillette, M. A., Paulovich, A.,  
706 Pomeroy, S. L., Golub, T. R., Lander, E. S., & Mesirov, J. P. (2005). Gene set enrichment analysis:  
707 A knowledge-based approach for interpreting genome-wide expression profiles. *Proceedings of the*  
708 *National Academy of Sciences of the United States of America*, 102(43).  
709 <https://doi.org/10.1073/pnas.0506580102>
- 710 Sullivan, K. E., & Black, L. D. (2013). The role of cardiac fibroblasts in extracellular matrix-mediated  
711 signaling during normal and pathological cardiac development. *Journal of Biomechanical*  
712 *Engineering*, 135(7). <https://doi.org/10.1115/1.4024349>
- 713 Thorvaldsen, J. L., Duran, K. L., & Bartolomei, M. S. (1998). Deletion of the H19 differentially  
714 methylated domain results in loss of imprinted expression of H19 and Igf2. *Genes and Development*.  
715 <https://doi.org/10.1101/gad.12.23.3693>
- 716 Thorvaldsen, J. L., Fedoriw, A. M., Nguyen, S., & Bartolomei, M. S. (2006). Developmental Profile of  
717 H19 Differentially Methylated Domain (DMD) Deletion Alleles Reveals Multiple Roles of the  
718 DMD in Regulating Allelic Expression and DNA Methylation at the Imprinted H19/Igf2 Locus.  
719 *Molecular and Cellular Biology*. <https://doi.org/10.1128/mcb.26.4.1245-1258.2006>
- 720 Thorvaldsen, J. L., Mann, M. R. W., Nwoko, O., Duran, K. L., & Bartolomei, M. S. (2002). Analysis of  
721 Sequence Upstream of the Endogenous H19 Gene Reveals Elements Both Essential and Dispensable  
722 for Imprinting. *Molecular and Cellular Biology*. <https://doi.org/10.1128/mcb.22.8.2450-2462.2002>
- 723 Ueno, M., Lee, L. K., Chhabra, A., Kim, Y. J., Sasidharan, R., VanHandel, B., Wang, Y., Kamata, M.,  
724 Kamran, P., Sereti, K. I., Ardehali, R., Jiang, M., & Mikkola, H. K. A. (2013). C-Met-Dependent  
725 Multipotent Labyrinth Trophoblast Progenitors Establish Placental Exchange Interface.  
726 *Developmental Cell*, 27(4), 373–386. <https://doi.org/10.1016/j.devcel.2013.10.019>
- 727 Vega-Hernández, M., Kovacs, A., de Langhe, S., & Ornitz, D. M. (2011). FGF10/FGFR2b signaling is

- 728 essential for cardiac fibroblast development and growth of the myocardium. *Development*, 138(15).  
729 <https://doi.org/10.1242/dev.064410>
- 730 Von Gise, A., & Pu, W. T. (2012). Endocardial and epicardial epithelial to mesenchymal transitions in  
731 heart development and disease. *Circulation Research*, 110(12), 1628–1645.  
732 <https://doi.org/10.1161/CIRCRESAHA.111.259960>
- 733 Vrooman, L. A., Rhon-Calderon, E. A., Chao, O. Y., Nguyen, D. K., Narapareddy, L., Dahiya, A. K.,  
734 Putt, M. E., Schultz, R. M., & Bartolomei, M. S. (2020). Assisted reproductive technologies induce  
735 temporally specific placental defects and the preeclampsia risk marker sFLT1 in mouse.  
736 *Development (Cambridge, England)*, 147(11). <https://doi.org/10.1242/dev.186551>
- 737 Wakeling, E. L., Brioude, F., Lokulo-Sodipe, O., O’Connell, S. M., Salem, J., Bliiek, J., Canton, A. P. M.,  
738 Chrzanowska, K. H., Davies, J. H., Dias, R. P., Dubern, B., Elbracht, M., Giabicani, E., Grimberg,  
739 A., Grønskov, K., Hokken-Koelega, A. C. S., Jorge, A. A., Kagami, M., Linglart, A., ... Netchine, I.  
740 (2017). Diagnosis and management of Silver-Russell syndrome: First international consensus  
741 statement. *Nature Reviews Endocrinology*, 13(2), 105–124. <https://doi.org/10.1038/nrendo.2016.138>
- 742 Wang, Y., Sun, X., & Sun, X. (2021). The Functions of LncRNA H19 in the Heart. In *Heart Lung and*  
743 *Circulation*. <https://doi.org/10.1016/j.hlc.2021.10.022>
- 744 Woods, L., Perez-Garcia, V., & Hemberger, M. (2018). Regulation of Placental Development and Its  
745 Impact on Fetal Growth—New Insights From Mouse Models. *Frontiers in Endocrinology*,  
746 9(September), 1–18. <https://doi.org/10.3389/fendo.2018.00570>
- 747 Yang, H., Wang, H., & Jaenisch, R. (2014). Generating genetically modified mice using CRISPR/Cas-  
748 mediated genome engineering. *Nature Protocols*, 9(8). <https://doi.org/10.1038/nprot.2014.134>  
749

750 **Supplemental Information**

751 **Generation of  $\Delta HI9$  allele.** Two pairs of gRNA targeting the *HI9* gene are listed in Supplemental Table  
752 1. gRNA was prepared following a protocol from Yang et al. (Yang et al., 2014) with modifications.  
753 px335 plasmid (Addgene, Watertown, MA) was PCR amplified using Phusion high-fidelity DNA  
754 polymerase (New England Biolabs, Ipswich, MA) and the primer set listed in Supplemental Table 1.  
755 ~117bp PCR product was gel-purified using the Gel Extraction kit (Qiagen, Hilden, Germany) according  
756 to the manufacturer's instruction. Using the gel-purified product as template, *in vitro* transcription of  
757 gRNA was setup using T7 High Yield RNA Synthesis kit (New England Biolabs) according to  
758 manufacturer's instructions. Transcribed gRNA was purified using the MEGAclean kit (Life  
759 Technologies, Carlsbad, CA) according to manufacturer's instructions. 50 ng/ $\mu$ l left and right sgRNA  
760 together with 100 ng/ $\mu$ l Cas9 mRNA was injected per zygote stage embryo by the Transgenic and  
761 Chimeric Mouse Facility at the University of Pennsylvania. The targeted allele was validated using  
762 Southern blot as previously described (Thorvaldsen et al., 1998) and PCR and sequencing across  
763 junctions of  $\Delta HI9$  alleles. Obtained chimeras and germ line transmission animals were PCR-genotyped  
764 for the  $\Delta HI9$  allele using primers (Supplemental Table 1).

765

766 **Genotyping.** Mouse genomic DNA for PCR genotyping was isolated from each animal as previously  
767 described (SanMiguel et al., 2018). Primers used for sex genotyping and genotyping of *hICI*,  $\Delta HI9$  and  
768  $\Delta 3.8$  alleles are listed in Supplemental Table 1. For all genotypes, the maternal allele is listed first and the  
769 paternal allele second.

770 **RNA Sequencing library preparation and analysis.** E12.5 hearts were lysed with Collagenase (Sigma-  
771 Aldrich), Dispase II (Sigma-Aldrich), and DNase I (Sigma-Aldrich). Cardiac endothelial cells were  
772 collected using MACS CD31 microbeads (Miltenyi Biotec, Bergisch Gladbach, Germany) and RNA was  
773 isolated using RNeasy Micro kit (Qiagen). After confirming RNA integrity using Bioanalyzer (Agilent  
774 Technologies, Santa Clara, CA), mRNA library was generated from 25ng RNA using NEBNext Poly(A)  
775 mRNA Magnetic Isolation Module and Ultra II RNA Library Prep Kit (New England Biolabs). Library  
776 quality was assessed by Bioanalyzer (Agilent Technologies) and TapeStation (Agilent Technologies).  
777 Sequencing was performed on NovaSeq 6000 (Illumina, San Diego, CA). Quality of raw fastq reads was  
778 assessed using FastQC version 0.11.5 (Andrews et al., 2015). Reads were aligned to the GRCm38/mm10  
779 reference using STAR version 2.4.0i with default parameters and maximum fragment size of 2000 bp  
780 (Dobin et al., 2013). Properly paired primary alignments were retained for downstream analysis using  
781 Samtools version 1.9. Count matrices were generated using FeatureCounts version 1.6.2 against RefSeq  
782 gene annotation and read into DESeq2 (Love et al., 2014) to perform normalization and statistical  
783 analysis.

784  
785 **Supplemental Figure 1. Supplementary data for anomalies observed in +/-h1C1 placentas.**  
786 (A) Quantification of ventricular wall thickness ( $\mu\text{m}$ ), measured from E15.5 wild-type and +/-h1C1 hearts  
787 (mean  $\pm$  SD). 4 wild-type and 3 +/-h1C1 embryos from two different litters were examined. (B) Fetal to  
788 placental weight ratios of the wild-type (blue) and +/-h1C1 (red) samples at E11.5, E12.5, E14.5 and E15.5.  
789 Each data point represents an average ratio of each genotype from one litter. (C) Junctional zone (Jz) to  
790 labyrinth (Lb) ratio in E17.5 wild-type and +/-h1C1 placentas. (D) Example of labyrinth zones that were  
791 used to quantify the microvessel density in CD34 immunostained E17.5 wild-type and +/-h1C1 placental  
792 sections from Figure 3G. Thrombi in +/-h1C1 placentas were excluded. (E) (Left) Representative images of  
793 PAS staining counterstained with hematoxylin on E17.5 wild-type and +/-h1C1 male placental sections.  
794 (Right) Quantification of PAS stained images. (F) Relative total expression of miR-675-3p and miR-675-  
795 5p in E15.5 wild-type and +/-h1C1 placentas (mean  $\pm$  SD). (A, C, E, F) Each data point represents an  
796 individual conceptus from different litters. Scale bars = 1 mm. Statistics used are (A, C, E, F) multiple  
797 unpaired t-tests, (B) multiple paired t-test. \* $P < 0.05$ , \*\* $P < 0.01$ , \*\*\* $P < 0.001$ , \*\*\*\* $P < 0.0001$ , ns = not  
798 significant.

799

800 **Supplemental Figure 2. Serial cross-sections of E15.5 +/-h1C1 embryonic heart with BPV.**



801 Sequential histological sections demonstrating the bicuspid pulmonary valve (BPV) phenotype.  
802 Rudimentary anterior cusp can be seen fused with the right pulmonary cusp (raphe) in sections denoted  
803 by \* above the pulmonary valve.  
804

805 **Supplemental Figure 3. Characterization of  $\Delta H19$  allele.**

806 (A) Targeting strategy to generate the  $\Delta H19$  allele. The endogenous *H19* locus is shown with restriction  
807 sites, gRNA locations used to generate the deletion and binding sites for probes used in Southern blot  
808 analysis (thick lines). (B) Southern blot analysis of  $\Delta H19$  allele. Founder 4131 line was generated using  
809 gRNA pair A, and founder 4133 line was generated using gRNA pair B (Supplemental Table 1). 3' probe  
810 and 5' probe were hybridized to XbaI- and KpnI-digested DNA, respectively. The sizes of the DNA  
811 fragments are shown on the right. (C) Allele-specific *Igf2* expression in wild-type and  $\Delta H19/+$  neonatal  
812 tongue, heart and liver analyzed by restriction fragment length polymorphism (RFLP). Ladder, genotypes  
813 and c (*Mus castaneus*, paternal) and b (C57BL/6, maternal) allele controls are indicated above each gel.  
814 Quantification of band densitometry is shown below each gel, with percent of maternal allele expression  
815 relative to paternal allele indicated. No expression from the maternal *Igf2* allele was observed in liver. (D)  
816 Embryonic and neonatal body weight of the wild-type (blue) and  $\Delta H19/+$  (green) samples at E11.5,  
817 E12.5, E14.5, E17.5, E18.5 and PN0 (mean  $\pm$  SD). 6 litters for E11.5, 6 litters for E12.5, 3 litters for  
818 E14.5, 11 litters for E17.5, 3 litters for E18.5, 14 litters for PN0 are presented. (E) Body weight of  $+/\Delta H19$   
819 neonates (mean  $\pm$  SD). 3 litters are presented. (D, E) Each data point represents an average weight of  
820 each genotype from one litter. Paired Student's t-test; \* $P < 0.05$ , \*\* $P < 0.01$ , \*\*\* $P < 0.001$ , \*\*\*\* $P < 0.0001$ ,  
821 ns = not significant.  
822

823 **Supplemental Figure 4. Supplementary data for rescue upon maternal  $\Delta H19$  transmission.**

824 (A) Ratio of wild-type,  $\Delta H19/+$ ,  $+/h1c1$  and  $\Delta H19/h1c1$  embryos observed in E11.5 and E17.5 litters (>5  
825 pups) (mean  $\pm$  SD). Each data point represents one litter. (B) (Left) Relative placental weights of E17.5  
826 wild-type,  $\Delta H19/+$ ,  $+/h1c1$  and  $\Delta H19/h1c1$  samples, normalized to the average placental weight of the  
827 wild-type littermates (mean  $\pm$  SD). (Right) Fetal to placental weight ratio in E17.5 wild-type,  $\Delta H19/+$ ,  
828  $+/h1c1$  and  $\Delta H19/h1c1$  samples (mean  $\pm$  SD). (C) Relative total expression of *H19* and *Igf2* in E17.5 wild-  
829 type,  $\Delta H19/+$ ,  $+/h1c1$  and  $\Delta H19/h1c1$  liver and tongue samples (mean  $\pm$  SD). (D) %Area of thrombotic  
830 clots in  $\Delta H19/h1c1$  placentas, relative to labyrinth zone. (B, C) Each data point represents an individual  
831 conceptus from different litters. Statistics used are (A) Paired Student's t-test, (B, C) One-way ANOVA  
832 with Tukey's multiple comparisons test; \* $P < 0.05$ , \*\* $P < 0.01$ , \*\*\* $P < 0.001$ , \*\*\*\* $P < 0.0001$ , ns = not  
833 significant.  
834

835 **Supplemental Figure 5. Supplementary data for rescue upon maternal  $\Delta 3.8$  transmission.**

836 (A) (Left) Relative placental weights of E17.5 wild-type,  $\Delta 3.8/+$ ,  $+/h1C1$  and  $\Delta 3.8/h1C1$  samples,  
837 normalized to the average placental weight of the wild-type littermates (mean  $\pm$  SD). (Right) Fetal to  
838 placental weight ratio in E17.5 wild-type,  $\Delta 3.8/+$ ,  $+/h1C1$  and  $\Delta 3.8/h1C1$  samples (mean  $\pm$  SD). (B)  
839 Relative total expression of *H19* and *Igf2* in E17.5 wild-type,  $\Delta 3.8/+$ ,  $+/h1C1$  and  $\Delta 3.8/h1C1$  liver and  
840 tongue samples (mean  $\pm$  SD). (C) Junctional zone (Jz) to labyrinth (Lb) ratio in E17.5 wild-type,  $\Delta 3.8/+$ ,  
841  $+/h1C1$  and  $\Delta 3.8/h1C1$  placentas. (A, B, C) Each data point represents an individual conceptus from  
842 different litters. One-way ANOVA with Tukey's multiple comparisons test; \* $P < 0.05$ , \*\* $P < 0.01$ , \*\*\* $P <$   
843  $0.001$ , \*\*\*\* $P < 0.0001$ , ns = not significant.

844

845 **Supplemental Figure 6. Supplementary data for differential gene expression of  $+/h1C1$  hearts.**

846 (A) DAPI (blue) on E17.5 wild-type and  $+/h1C1$  hearts from Figure 6C. Images on the right are enlarged  
847 from the boxed area of images on the left. Scale bars = 100  $\mu$ m. (B) Immunofluorescence staining for  
848 MF20 (red), collagen I (green), and DAPI (blue) on E17.5  $+/h1C1$  hearts. Images on the right are enlarged  
849 from the boxed area of images on the left. Scale Bars = 100  $\mu$ m. (C) Same-sex comparisons between  
850  $+/h1C1$  and the wild-type samples analyzed by RNA sequencing. (D) Chromosomal distribution of DEGs  
851 from comparisons between  $+/h1C1$  and wild-type males and females.

852

853 **Supplemental Figure 7.** (A) Volcano plot depicting comparison of  $\Delta H19/h1C1$  and wild-type cardiac  
854 endothelial cells. (B) Volcano plot depicting comparison of  $+/h1C1$  and  $\Delta H19/h1C1$  cardiac endothelial  
855 cells. (C) GO pathways that are enriched for 46 DEGs between  $+/h1C1$  and  $\Delta H19/h1C1$  samples.

856

857 **Supplemental Figure 8. Enrichment tests for BRIDEAU\_IMPRINTED\_GENES using GSEA.**

858 Normalized enrichment score (NES), nominal p-value, enrichment plot and expression heatmap of the  
859 analyzed gene set comparing (A)  $+/h1C1$  and wild-type, (B)  $\Delta H19/+$  and wild-type, (C)  $\Delta H19/h1C1$  and  
860 wild-type cardiac endothelial cells.

861

862 **Supplemental Figure 9.** (A) Volcano plot depicting comparison of  $+/h1C1$  and  $\Delta 3.8/h1C1$  cardiac  
863 endothelial cells. (B) GO pathways that are enriched for 116 DEGs that are commonly differentially  
864 expressed in  $+/h1C1$  compared to wild-type and  $\Delta 3.8/h1C1$  samples. (C) Volcano plot depicting  
865 comparison of  $\Delta 3.8/+$  and wild-type cardiac endothelial cells.

866

867 **Supplemental Figure 10. Enrichment tests for HALLMARK\_HYPOXIA,  
868 GROSS\_HYPOXIA\_VIA\_HIF1A\_DN using GSEA.**

869 Normalized enrichment score (NES), nominal p-value, enrichment plot and expression heatmap of the (A)  
870 HALLMARK\_HYPOXIA, (B) GROSS\_HYPOXIA\_VIA\_HIF1A\_DN gene set comparing  $+/h1C1$  and wild-  
871 type cardiac endothelial cells.

872

873 **Supplemental References**

874 Abi Habib, W., Brioude, F., Azzi, S., Salem, J., Das Neves, C., Personnier, C., Chantot-Bastaraud, S.,

875 Keren, B., Le Bouc, Y., Harbison, M. D., & Netchine, I. (2017). 11p15 ICR1 Partial Deletions

876 Associated with IGF2/H19 DMR Hypomethylation and Silver–Russell Syndrome. *Human Mutation*.

877 <https://doi.org/10.1002/humu.23131>

878 Andrews, S., Krueger, F., Seconds-Pichon, A., Biggins, F., & Wingett, S. (2015). *FastQC. A quality*

879 *control tool for high throughput sequence data. Babraham Bioinformatics*. Babraham Institute.

880 Aykroyd, B. R. L., Tunster, S. J., & Sferruzzi-Perri, A. N. (2022). Loss of imprinting of the Igf2-H19

881 ICR1 enhances placental endocrine capacity via sex-specific alterations in signalling pathways in

882 the mouse . *Development*, *149*(1). <https://doi.org/10.1242/dev.199811>

883 Barak, Y., Hemberger, M., & Sucov, H. M. (2019). Phases and Mechanisms of Embryonic

884 Cardiomyocyte Proliferation and Ventricular Wall Morphogenesis. *Pediatric Cardiology*, *40*(7),

885 1359–1366. <https://doi.org/10.1007/s00246-019-02164-6>

886 Barlow, D. P., & Bartolomei, M. S. (2014). Genomic imprinting in mammals. *Cold Spring Harbor*

887 *Perspectives in Biology*. <https://doi.org/10.1101/cshperspect.a018382>

888 Begemann, M., Zirn, B., Santen, G., Wirthgen, E., Soellner, L., Büttel, H.-M., Schweizer, R., van

889 Workum, W., Binder, G., & Eggermann, T. (2015). Paternally Inherited IGF2 Mutation and Growth

890 Restriction . *New England Journal of Medicine*, *373*(4). <https://doi.org/10.1056/nejmoa1415227>

891 Borensztein, M., Viengchareun, S., Montarras, D., Journot, L., Binart, N., Lombès, M., & Dandolo, L.

892 (2012). Double Myod and Igf2 inactivation promotes brown adipose tissue development by

893 increasing Prdm16 expression. *FASEB Journal*. <https://doi.org/10.1096/fj.12-208496>

894 Chang, S., & Bartolomei, M. S. (2020). Modeling human epigenetic disorders in mice: Beckwith-

895 Wiedemann syndrome and Silver-Russell syndrome. In *DMM Disease Models and Mechanisms*

896 (Vol. 13, Issue 5). <https://doi.org/10.1242/dmm.044123>

897 Chen, C. P., Chang, S. Y., Lin, C. J., Chern, S. R., Wu, P. S., Chen, S. W., Lai, S. T., Chuang, T. Y.,

- 898 Chen, W. L., Yang, C. W., & Wang, W. (2018). Prenatal diagnosis of a familial 5p14.3-p14.1  
899 deletion encompassing CDH18, CDH12, PMCHL1, PRDM9 and CDH10 in a fetus with congenital  
900 heart disease on prenatal ultrasound. *Taiwanese Journal of Obstetrics and Gynecology*, 57(5).  
901 <https://doi.org/10.1016/j.tjog.2018.08.023>
- 902 Choong, O. K., Chen, C. Y., Zhang, J., Lin, J. H., Lin, P. J., Ruan, S. C., Kamp, T. J., & Hsieh, P. C. H.  
903 (2019). Hypoxia-induced H19/YB-1 cascade modulates cardiac remodeling after infarction.  
904 *Theranostics*, 9(22). <https://doi.org/10.7150/thno.35218>
- 905 Conigliaro, A., Costa, V., Lo Dico, A., Saieva, L., Buccheri, S., Dieli, F., Manno, M., Raccosta, S.,  
906 Mancone, C., Tripodi, M., De Leo, G., & Alessandro, R. (2015). CD90+ liver cancer cells modulate  
907 endothelial cell phenotype through the release of exosomes containing H19 lncRNA. *Molecular*  
908 *Cancer*, 14(1), 1–11. <https://doi.org/10.1186/s12943-015-0426-x>
- 909 Constância, M., Hemberger, M., Hughes, J., Dean, W., Ferguson-Smith, A., Fundele, R., Stewart, F.,  
910 Kelsey, G., Fowden, A., Sibley, C., & Reik, W. (2002). Placental-specific IGF-II is a major  
911 modulator of placental and fetal growth. *Nature*, 417(6892), 945–948.  
912 <https://doi.org/10.1038/nature00819>
- 913 DeChiara, T. M., Robertson, E. J., & Efstratiadis, A. (1991). Parental imprinting of the mouse insulin-like  
914 growth factor II gene. *Cell*. [https://doi.org/10.1016/0092-8674\(91\)90513-X](https://doi.org/10.1016/0092-8674(91)90513-X)
- 915 Dobin, A., Davis, C. A., Schlesinger, F., Drenkow, J., Zaleski, C., Jha, S., Batut, P., Chaisson, M., &  
916 Gingeras, T. R. (2013). STAR: Ultrafast universal RNA-seq aligner. *Bioinformatics*, 29(1).  
917 <https://doi.org/10.1093/bioinformatics/bts635>
- 918 Dor, Y., Camenisch, T. D., Itin, A., Fishman, G. I., McDonald, J. A., Carmeliet, P., & Keshet, E. (2001).  
919 A novel role for VEGF in endocardial cushion formation and its potential contribution to congenital  
920 heart defects. *Development*, 128(9). <https://doi.org/10.1242/dev.128.9.1531>
- 921 Drewell, R. A., Brenton, J. D., Ainscough, J. F. X., Barton, S. C., Hilton, K. J., Arney, K. L., Dandolo, L.,  
922 & Surani, M. A. (2000). Deletion of a silencer element disrupts H19 imprinting independently of a  
923 DNA methylation epigenetic switch. *Development*.

- 924 Eggermann, T., Buiting, K., & Temple, I. K. (2011). Clinical utility gene card for: Silver-Russell  
925 syndrome. *European Journal of Human Genetics*. <https://doi.org/10.1038/ejhg.2010.202>
- 926 Eisenberg, L. M., & Markwald, R. R. (1995). Molecular regulation of atrioventricular valvuloseptal  
927 morphogenesis. In *Circulation Research* (Vol. 77, Issue 1). <https://doi.org/10.1161/01.RES.77.1.1>
- 928 Engel, N., West, A. G., Felsenfeld, G., & Bartolomei, M. S. (2004). Antagonism between DNA  
929 hypermethylation and enhancer-blocking activity at the H19 DMD is uncovered by CpG mutations.  
930 *Nature Genetics*. <https://doi.org/10.1038/ng1399>
- 931 Esquiliano, D. R., Guo, W., Liang, L., Dikkes, P., & Lopez, M. F. (2009). Placental Glycogen Stores are  
932 Increased in Mice with H19 Null Mutations but not in those with Insulin or IGF Type 1 Receptor  
933 Mutations. *Placenta*, 30(8). <https://doi.org/10.1016/j.placenta.2009.05.004>
- 934 Freschi, A., Del Prete, R., Pignata, L., Cecere, F., Manfredola, F., Mattia, M., Cobellis, G., Sparago, A.,  
935 Bartolomei, M. S., Riccio, A., & Cerrato, F. (2021). The number of the CTCF binding sites of the  
936 H19/IGF2:IG-DMR correlates with DNA methylation and expression imprinting in a humanized  
937 mouse model. *Human Molecular Genetics*, 30(16). <https://doi.org/10.1093/hmg/ddab132>
- 938 Freschi, A., Hur, S. K., Valente, F. M., Ideraabdullah, F. Y., Sparago, A., Gentile, M. T., Oneglia, A., Di  
939 Nucci, D., Colucci-D'Amato, L., Thorvaldsen, J. L., Bartolomei, M. S., Riccio, A., & Cerrato, F.  
940 (2018). Tissue-specific and mosaic imprinting defects underlie opposite congenital growth disorders  
941 in mice. *PLoS Genetics*. <https://doi.org/10.1371/journal.pgen.1007243>
- 942 Gabory, A., Jammes, H., & Dandolo, L. (2010). The H19 locus: Role of an imprinted non-coding RNA in  
943 growth and development. In *BioEssays*. <https://doi.org/10.1002/bies.200900170>
- 944 Gabory, A., Ripoche, M. A., Le Digarcher, A., Watrin, F., Ziyat, A., Forné, T., Jammes, H., Ainscough,  
945 J. F. X., Surani, M. A., Journot, L., & Dandolo, L. (2009). H19 acts as a trans regulator of the  
946 imprinted gene network controlling growth in mice. *Development*.  
947 <https://doi.org/10.1242/dev.036061>
- 948 García-Padilla, C., Domínguez, J. N., Aránega, A. E., & Franco, D. (2019). Differential chamber-specific  
949 expression and regulation of long non-coding RNAs during cardiac development. *Biochimica et*

- 950 *Biophysica Acta - Gene Regulatory Mechanisms*, 1862(10), 194435.
- 951 <https://doi.org/10.1016/j.bbagr.2019.194435>
- 952 Ghanim, M., Rossignol, S., Delobel, B., Irving, M., Miller, O., Devisme, L., Plennevaux, J. L.,  
953 Lucidarme-Rossi, S., Manouvrier, S., Salah, A., Chivu, O., Netchine, I., & Vincent-Delorme, C.  
954 (2013). Possible association between complex congenital heart defects and 11p15 hypomethylation  
955 in three patients with severe Silver-Russell syndrome. *American Journal of Medical Genetics, Part*  
956 *A*, 161(3), 572–577. <https://doi.org/10.1002/ajmg.a.35691>
- 957 Gicquel, C., Rossignol, S., Cabrol, S., Houang, M., Steunou, V., Barbu, V., Danton, F., Thibaud, N., Le  
958 Merrer, M., Burglen, L., Bertrand, A. M., Netchine, I., & Le Bouc, Y. (2005). Epimutation of the  
959 telomeric imprinting center region on chromosome 11p15 in Silver-Russell syndrome. *Nature*  
960 *Genetics*, 37(9), 1003–1007. <https://doi.org/10.1038/ng1629>
- 961 Greco, S., Zaccagnini, G., Perfetti, A., Fuschi, P., Valaperta, R., Voellenkle, C., Castelvechio, S.,  
962 Gaetano, C., Finato, N., Beltrami, A. P., Menicanti, L., & Martelli, F. (2016). Long noncoding RNA  
963 dysregulation in ischemic heart failure. *Journal of Translational Medicine*, 14(1), 1–14.  
964 <https://doi.org/10.1186/s12967-016-0926-5>
- 965 Haley, V. L., Barnes, D. J., Sandovici, I., Constancia, M., Graham, C. F., Pezzella, F., Bühnenmann, C.,  
966 Carter, E. J., & Hassan, A. B. (2012). Igf2 pathway dependency of the Trp53 developmental and  
967 tumour phenotypes. *EMBO Molecular Medicine*. <https://doi.org/10.1002/emmm.201101105>
- 968 Han, L., Szabó, P. E., & Mann, J. R. (2010). Postnatal survival of mice with maternal duplication of distal  
969 chromosome 7 induced by a Igf2/H19 imprinting control region lacking insulator function. *PLoS*  
970 *Genetics*. <https://doi.org/10.1371/journal.pgen.1000803>
- 971 Harris, L. K., & Westwood, M. (2012). Biology and significance of signalling pathways activated by  
972 IGF-II. *Growth Factors*, 30(1), 1–12. <https://doi.org/10.3109/08977194.2011.640325>
- 973 Hobuß, L., Foinquinos, A., Jung, M., Kenneweg, F., Xiao, K., Wang, Y., Zimmer, K., Remke, J., Just, A.,  
974 Nowak, J., Schmidt, A., Pich, A., Mazlan, S., Reamon-Buettner, S. M., Ramos, G. C., Frantz, S.,  
975 Viereck, J., Loyer, X., Boulanger, C., ... Thum, T. (2020). Pleiotropic cardiac functions controlled

- 976 by ischemia-induced lincRNA H19. *Journal of Molecular and Cellular Cardiology*, 146(July 2019),  
977 43–59. <https://doi.org/10.1016/j.yjmcc.2020.07.001>
- 978 Hubert, F., Payan, S. M., & Rochais, F. (2018). FGF10 Signaling in Heart Development, Homeostasis,  
979 Disease and Repair. In *Frontiers in Genetics* (Vol. 9). <https://doi.org/10.3389/fgene.2018.00599>
- 980 Hur, S. K., Freschi, A., Ideraabdullah, F., Thorvaldsen, J. L., Luense, L. J., Weller, A. H., Berger, S. L.,  
981 Cerrato, F., Riccio, A., & Bartolomei, M. S. (2016). Humanized H19/Igf2 locus reveals diverged  
982 imprinting mechanism between mouse and human and reflects Silver-Russell syndrome phenotypes.  
983 *Proceedings of the National Academy of Sciences of the United States of America*.  
984 <https://doi.org/10.1073/pnas.1603066113>
- 985 Keniry, A., Oxley, D., Monnier, P., Kyba, M., Dandolo, L., Smits, G., & Reik, W. (2012). The H19  
986 lincRNA is a developmental reservoir of miR-675 that suppresses growth and Igf1r. *Nature Cell*  
987 *Biology*. <https://doi.org/10.1038/ncb2521>
- 988 Kochilas, L. K., Li, J., Jin, F., Buck, C. A., & Epstein, J. A. (1999). p57Kip2 expression is enhanced  
989 during mid-cardiac murine development and is restricted to trabecular myocardium. *Pediatric*  
990 *Research*, 45(5). <https://doi.org/10.1203/00006450-199905010-00004>
- 991 Kruithof, B. P. T., Krawitz, S. A., & Gaussin, V. (2007). Atrioventricular valve development during late  
992 embryonic and postnatal stages involves condensation and extracellular matrix remodeling.  
993 *Developmental Biology*, 302(1). <https://doi.org/10.1016/j.ydbio.2006.09.024>
- 994 Lee, J. H., Gao, C., Peng, G., Greer, C., Ren, S., Wang, Y., & Xiao, X. (2011). Analysis of transcriptome  
995 complexity through RNA sequencing in normal and failing murine hearts. *Circulation Research*,  
996 109(12), 1332–1341. <https://doi.org/10.1161/CIRCRESAHA.111.249433>
- 997 Li, P., Cavallero, S., Gu, Y., Chen, T. H. P., Hughes, J., Hassan, A. B., Brüning, J. C., Pashmforoush, M.,  
998 & Sucov, H. M. (2011). IGF signaling directs ventricular cardiomyocyte proliferation during  
999 embryonic heart development. *Development*, 138(9), 1795–1805.  
1000 <https://doi.org/10.1242/dev.054338>
- 1001 Liao, J., Zeng, T. B., Pierce, N., Tran, D. A., Singh, P., Mann, J. R., & Szabó, P. E. (2021). Prenatal

- 1002 correction of IGF2 to rescue the growth phenotypes in mouse models of Beckwith-Wiedemann and  
1003 Silver-Russell syndromes. *Cell Reports*, 34(6). <https://doi.org/10.1016/j.celrep.2021.108729>
- 1004 Lopez, M. F., Dikkes, P., Zurakowski, D., & Villa-Komaroff, L. (1996). Insulin-like growth factor II  
1005 affects the appearance and glycogen content of glycogen cells in the murine placenta.  
1006 *Endocrinology*, 137(5). <https://doi.org/10.1210/endo.137.5.8612553>
- 1007 Love, M. I., Huber, W., & Anders, S. (2014). Moderated estimation of fold change and dispersion for  
1008 RNA-seq data with DESeq2. *Genome Biology*, 15(12). <https://doi.org/10.1186/s13059-014-0550-8>
- 1009 Marsh, B., & Blelloch, R. (2020). Single nuclei RNA-seq of mouse placental labyrinth development.  
1010 *ELife*, 9. <https://doi.org/10.7554/eLife.60266>
- 1011 Maslen, C. L. (2018). Recent advances in placenta-heart interactions. *Frontiers in Physiology*, 9(JUN), 1–  
1012 9. <https://doi.org/10.3389/fphys.2018.00735>
- 1013 Matthiesen, N. B., Henriksen, T. B., Agergaard, P., Gaynor, J. W., Bach, C. C., Hjortdal, V. E., &  
1014 Østergaard, J. R. (2016). Congenital Heart Defects and Indices of Placental and Fetal Growth in a  
1015 Nationwide Study of 924 422 Liveborn Infants. *Circulation*, 134(20), 1546–1556.  
1016 <https://doi.org/10.1161/CIRCULATIONAHA.116.021793>
- 1017 Mi, H., Muruganujan, A., Ebert, D., Huang, X., & Thomas, P. D. (2019). PANTHER version 14: More  
1018 genomes, a new PANTHER GO-slim and improvements in enrichment analysis tools. *Nucleic Acids*  
1019 *Research*, 47(D1). <https://doi.org/10.1093/nar/gky1038>
- 1020 Mootha, V. K., Lindgren, C. M., Eriksson, K. F., Subramanian, A., Sihag, S., Lehar, J., Puigserver, P.,  
1021 Carlsson, E., Ridderstråle, M., Laurila, E., Houstis, N., Daly, M. J., Patterson, N., Mesirov, J. P.,  
1022 Golub, T. R., Tamayo, P., Spiegelman, B., Lander, E. S., Hirschhorn, J. N., ... Groop, L. C. (2003).  
1023 PGC-1 $\alpha$ -responsive genes involved in oxidative phosphorylation are coordinately downregulated in  
1024 human diabetes. *Nature Genetics*, 34(3). <https://doi.org/10.1038/ng1180>
- 1025 Penny, D. J., & Vick, G. W. (2011). Ventricular septal defect. *The Lancet*, 377(9771), 1103–1112.  
1026 [https://doi.org/10.1016/S0140-6736\(10\)61339-6](https://doi.org/10.1016/S0140-6736(10)61339-6)
- 1027 Perez-Garcia, V., Fineberg, E., Wilson, R., Murray, A., Mazzeo, C. I., Tudor, C., Sienerth, A., White, J.



- 1028 K., Tuck, E., Ryder, E. J., Gleeson, D., Siragher, E., Wardle-Jones, H., Staudt, N., Wali, N., Collins,  
1029 J., Geyer, S., Busch-Nentwich, E. M., Galli, A., ... Hemberger, M. (2018). Placentation defects are  
1030 highly prevalent in embryonic lethal mouse mutants. *Nature*, 555(7697), 463–468.  
1031 <https://doi.org/10.1038/nature26002>
- 1032 Poirier, F., Chan, C. T. J., Timmons, P. M., Robertson, E. J., Evans, M. J., & Rigby, P. W. J. (1991). The  
1033 murine H19 gene is activated during embryonic stem cell differentiation in vitro and at the time of  
1034 implantation in the developing embryo. *Development*, 113(4).  
1035 <https://doi.org/10.1242/dev.113.4.1105>
- 1036 Rochais, F., Sturny, R., Chao, C. M., Mesbah, K., Bennett, M., Mohun, T. J., Bellusci, S., & Kelly, R. G.  
1037 (2014). FGF10 promotes regional foetal cardiomyocyte proliferation and adult cardiomyocyte cell-  
1038 cycle re-entry. *Cardiovascular Research*, 104(3). <https://doi.org/10.1093/cvr/cvu232>
- 1039 Rychik, J., Goff, D., McKay, E., Mott, A., Tian, Z., Licht, D. J., & Gaynor, J. W. (2018). Characterization  
1040 of the Placenta in the Newborn with Congenital Heart Disease: Distinctions Based on Type of  
1041 Cardiac Malformation. *Pediatric Cardiology*, 39(6), 1165–1171. [https://doi.org/10.1007/s00246-](https://doi.org/10.1007/s00246-018-1876-x)  
1042 [018-1876-x](https://doi.org/10.1007/s00246-018-1876-x)
- 1043 Sandovici, I., Georgopoulou, A., Pérez-García, V., Hufnagel, A., López-Tello, J., Lam, B. Y. H.,  
1044 Schiefer, S. N., Gaudreau, C., Santos, F., Hoelle, K., Yeo, G. S. H., Burling, K., Reiterer, M.,  
1045 Fowden, A. L., Burton, G. J., Branco, C. M., Sferruzzi-Perri, A. N., & Constância, M. (2022). The  
1046 imprinted Igf2-Igf2r axis is critical for matching placental microvasculature expansion to fetal  
1047 growth. *Developmental Cell*, 57(1), 63-79.e8. <https://doi.org/10.1016/j.devcel.2021.12.005>
- 1048 SanMiguel, J. M., Abramowitz, L. K., & Bartolomei, M. S. (2018). Imprinted gene dysregulation in a  
1049 Tet1 null mouse model is stochastic and variable in the germline and offspring. *Development*  
1050 *(Cambridge)*, 145(7). <https://doi.org/10.1242/dev.160622>
- 1051 Savolainen, S. M., Foley, J. F., & Elmore, S. A. (2009). Histology atlas of the developing mouse heart  
1052 with emphasis on E11.5 to E18.5. *Toxicologic Pathology*, 37(4), 395–414.  
1053 <https://doi.org/10.1177/0192623309335060>

- 1054 Schindelin, J., Arganda-Carreras, I., Frise, E., Kaynig, V., Longair, M., Pietzsch, T., Preibisch, S.,  
1055 Rueden, C., Saalfeld, S., Schmid, B., Tinevez, J. Y., White, D. J., Hartenstein, V., Eliceiri, K.,  
1056 Tomancak, P., & Cardona, A. (2012). Fiji: An open-source platform for biological-image analysis.  
1057 In *Nature Methods* (Vol. 9, Issue 7). <https://doi.org/10.1038/nmeth.2019>
- 1058 Serra, A., Eirich, K., Winkler, A. K., Mrasek, K., Ghring, G., Barbi, G., Cario, H., Schlegelberger, B.,  
1059 Pokora, B., Liehr, T., Leriche, C., Henne-Bruns, D., Barth, T. F., & Schindler, D. (2012). Shared  
1060 copy number variation in simultaneous nephroblastoma and neuroblastoma due to Fanconi anemia.  
1061 *Molecular Syndromology*, 3(3), 120–130. <https://doi.org/10.1159/000341935>
- 1062 Shen, H., Cavallero, S., Estrada, K. D., Sandovici, I., Kumar, S. R., Makita, T., Lien, C. L., Constancia,  
1063 M., & Sucov, H. M. (2015). Extracardiac control of embryonic cardiomyocyte proliferation and  
1064 ventricular wall expansion. *Cardiovascular Research*, 105(3), 271–278.  
1065 <https://doi.org/10.1093/cvr/cvu269>
- 1066 Shen, H., Gan, P., Wang, K., Darehzereshki, A., Wang, K., Ram Kumar, S., Lien, C. L., Patterson, M.,  
1067 Tao, G., & Sucov, H. M. (2020). Mononuclear diploid cardiomyocytes support neonatal mouse heart  
1068 regeneration in response to paracrine IGF2 signaling. *ELife*, 9, 1–24.  
1069 <https://doi.org/10.7554/eLife.53071>
- 1070 Sibley, C. P., Coan, P. M., Dean, W., Hughes, J., Smith, P., Reik, W., & Burton, G. J. (2004). *Regulates*  
1071 *the Diffusional Exchange Characteristics of the Mouse Placenta*. 2.
- 1072 Snider, P., & Conway, S. J. (2011). Probing human cardiovascular congenital disease using transgenic  
1073 mouse models. In *Progress in Molecular Biology and Translational Science* (1st ed., Vol. 100).  
1074 Elsevier Inc. <https://doi.org/10.1016/B978-0-12-384878-9.00003-0>
- 1075 Soellner, L., Kraft, F., Sauer, S., Begemann, M., Kurth, I., Elbracht, M., & Eggermann, T. (2019). Search  
1076 for cis-acting factors and maternal effect variants in Silver-Russell patients with ICR1  
1077 hypomethylation and their mothers. *European Journal of Human Genetics*, 27(1).  
1078 <https://doi.org/10.1038/s41431-018-0269-1>
- 1079 Soemedi, R., Wilson, I. J., Bentham, J., Darlay, R., Töpf, A., Zelenika, D., Cosgrove, C., Setchfield, K.,

- 1080 Thornborough, C., Granados-Riveron, J., Blue, G. M., Breckpot, J., Hellens, S., Zwolinski, S.,  
1081 Glen, E., Mamasoula, C., Rahman, T. J., Hall, D., Rauch, A., ... Keavney, B. D. (2012).  
1082 Contribution of global rare copy-number variants to the risk of sporadic congenital heart disease.  
1083 *American Journal of Human Genetics*, 91(3). <https://doi.org/10.1016/j.ajhg.2012.08.003>
- 1084 Spicer, D. E., Hsu, H. H., Co-Vu, J., Anderson, R. H., & Fricker, F. J. (2014). Ventricular septal defect.  
1085 *Orphanet Journal of Rare Diseases*, 9, 144. <https://doi.org/10.1186/s13023-014-0144-2>
- 1086 Subramanian, A., Tamayo, P., Mootha, V. K., Mukherjee, S., Ebert, B. L., Gillette, M. A., Paulovich, A.,  
1087 Pomeroy, S. L., Golub, T. R., Lander, E. S., & Mesirov, J. P. (2005). Gene set enrichment analysis:  
1088 A knowledge-based approach for interpreting genome-wide expression profiles. *Proceedings of the*  
1089 *National Academy of Sciences of the United States of America*, 102(43).  
1090 <https://doi.org/10.1073/pnas.0506580102>
- 1091 Sullivan, K. E., & Black, L. D. (2013). The role of cardiac fibroblasts in extracellular matrix-mediated  
1092 signaling during normal and pathological cardiac development. *Journal of Biomechanical*  
1093 *Engineering*, 135(7). <https://doi.org/10.1115/1.4024349>
- 1094 Thorvaldsen, J. L., Duran, K. L., & Bartolomei, M. S. (1998). Deletion of the H19 differentially  
1095 methylated domain results in loss of imprinted expression of H19 and Igf2. *Genes and Development*.  
1096 <https://doi.org/10.1101/gad.12.23.3693>
- 1097 Thorvaldsen, J. L., Fedoriw, A. M., Nguyen, S., & Bartolomei, M. S. (2006). Developmental Profile of  
1098 H19 Differentially Methylated Domain (DMD) Deletion Alleles Reveals Multiple Roles of the  
1099 DMD in Regulating Allelic Expression and DNA Methylation at the Imprinted H19/Igf2 Locus.  
1100 *Molecular and Cellular Biology*. <https://doi.org/10.1128/mcb.26.4.1245-1258.2006>
- 1101 Thorvaldsen, J. L., Mann, M. R. W., Nwoko, O., Duran, K. L., & Bartolomei, M. S. (2002). Analysis of  
1102 Sequence Upstream of the Endogenous H19 Gene Reveals Elements Both Essential and Dispensable  
1103 for Imprinting. *Molecular and Cellular Biology*. <https://doi.org/10.1128/mcb.22.8.2450-2462.2002>
- 1104 Ueno, M., Lee, L. K., Chhabra, A., Kim, Y. J., Sasidharan, R., VanHandel, B., Wang, Y., Kamata, M.,  
1105 Kamran, P., Sereti, K. I., Ardehali, R., Jiang, M., & Mikkola, H. K. A. (2013). C-Met-Dependent

- 1106 Multipotent Labyrinth Trophoblast Progenitors Establish Placental Exchange Interface.  
1107 *Developmental Cell*, 27(4), 373–386. <https://doi.org/10.1016/j.devcel.2013.10.019>
- 1108 Vega-Hernández, M., Kovacs, A., de Langhe, S., & Ornitz, D. M. (2011). FGF10/FGFR2b signaling is  
1109 essential for cardiac fibroblast development and growth of the myocardium. *Development*, 138(15).  
1110 <https://doi.org/10.1242/dev.064410>
- 1111 Von Gise, A., & Pu, W. T. (2012). Endocardial and epicardial epithelial to mesenchymal transitions in  
1112 heart development and disease. *Circulation Research*, 110(12), 1628–1645.  
1113 <https://doi.org/10.1161/CIRCRESAHA.111.259960>
- 1114 Vrooman, L. A., Rhon-Calderon, E. A., Chao, O. Y., Nguyen, D. K., Narapareddy, L., Dahiya, A. K.,  
1115 Putt, M. E., Schultz, R. M., & Bartolomei, M. S. (2020). Assisted reproductive technologies induce  
1116 temporally specific placental defects and the preeclampsia risk marker sFLT1 in mouse.  
1117 *Development (Cambridge, England)*, 147(11). <https://doi.org/10.1242/dev.186551>
- 1118 Wakeling, E. L., Brioude, F., Lokulo-Sodipe, O., O’Connell, S. M., Salem, J., Bliet, J., Canton, A. P. M.,  
1119 Chrzanowska, K. H., Davies, J. H., Dias, R. P., Dubern, B., Elbracht, M., Giabicani, E., Grimberg,  
1120 A., Grønskov, K., Hokken-Koelega, A. C. S., Jorge, A. A., Kagami, M., Linglart, A., ... Netchine, I.  
1121 (2017). Diagnosis and management of Silver-Russell syndrome: First international consensus  
1122 statement. *Nature Reviews Endocrinology*, 13(2), 105–124. <https://doi.org/10.1038/nrendo.2016.138>
- 1123 Wang, Y., Sun, X., & Sun, X. (2021). The Functions of LncRNA H19 in the Heart. In *Heart Lung and*  
1124 *Circulation*. <https://doi.org/10.1016/j.hlc.2021.10.022>
- 1125 Woods, L., Perez-Garcia, V., & Hemberger, M. (2018). Regulation of Placental Development and Its  
1126 Impact on Fetal Growth—New Insights From Mouse Models. *Frontiers in Endocrinology*,  
1127 9(September), 1–18. <https://doi.org/10.3389/fendo.2018.00570>
- 1128 Yang, H., Wang, H., & Jaenisch, R. (2014). Generating genetically modified mice using CRISPR/Cas-  
1129 mediated genome engineering. *Nature Protocols*, 9(8). <https://doi.org/10.1038/nprot.2014.134>
- 1130
